# Supplementary material for: Evaluation of a federally funded mass media campaign and smoking cessation in pregnant women: a population-based study in three states
Source: PubMed Central journal article supplement — BMJ Open. 2017 Dec 19;7(12):e016826. doi: 10.1136/bmjopen-2017-016826 (PMC5778314; doi:10.1136/bmjopen-2017-016826), 2017-12-19
Supplement: bmjopen-2017-016826.draft_revisions.pdf [file bmjopen-2017-016826.draft_revisions.pdf]

# BMJ Open

BMJ Open is committed to open peer review. As part of this commitment we make the peer review history of every article we publish publicly available.

When an article is published we post the peer reviewers' comments and the authors' responses online. We also post the versions of the paper that were used during peer review. These are the versions that the peer review comments apply to.

The versions of the paper that follow are the versions that were submitted during the peer review process. They are not the versions of record or the final published versions. They should not be cited or distributed as the published version of this manuscript.

BMJ Open is an open access journal and the full, final, typeset and author-corrected version of record of the manuscript is available on our site with no access controls, subscription charges or pay-per-view fees (<http://bmjopen.bmj.com>).

If you have any questions on BMJ Open's open peer review process please email [editorial.bmjopen@bmj.com](mailto:editorial.bmjopen@bmj.com)

# BMJ Open

## Evaluation of a federally-funded mass media campaign and smoking cessation in pregnant women: a population-based study in three states

|                                 |                                                                                                                                                                                                                                                                                                                                                                                                                                                                                                       |
|---------------------------------|-------------------------------------------------------------------------------------------------------------------------------------------------------------------------------------------------------------------------------------------------------------------------------------------------------------------------------------------------------------------------------------------------------------------------------------------------------------------------------------------------------|
| Journal:                        | <i>BMJ Open</i>                                                                                                                                                                                                                                                                                                                                                                                                                                                                                       |
| Manuscript ID                   | bmjopen-2017-016826                                                                                                                                                                                                                                                                                                                                                                                                                                                                                   |
| Article Type:                   | Research                                                                                                                                                                                                                                                                                                                                                                                                                                                                                              |
| Date Submitted by the Author:   | 17-Mar-2017                                                                                                                                                                                                                                                                                                                                                                                                                                                                                           |
| Complete List of Authors:       | England, Lucinda; Centre for Disease Control, Tong, Van; Centre for Disease Control Rockhill, Kari; Centre for Disease Control Hsia, Jason; Centre for Disease Control McAfee, Tim; Centre for Disease Control Patel, Deesha; Centre for Disease Control Rupp, Katelin ; Indiana State Department of Health Conrey, Elizabeth; Centers for Disease Control and Prevention; Ohio Department of Mental Health Valdivieso, Claudia; Kentucky Department of Public Health Davis, Kevin; RTI International |
| <b>Primary Subject Heading</b>: | Public health                                                                                                                                                                                                                                                                                                                                                                                                                                                                                         |
| Secondary Subject Heading:      | Smoking and tobacco                                                                                                                                                                                                                                                                                                                                                                                                                                                                                   |
| Keywords:                       | pregnancy, smoking cessation, mass media campaign                                                                                                                                                                                                                                                                                                                                                                                                                                                     |
|                                 |                                                                                                                                                                                                                                                                                                                                                                                                                                                                                                       |

SCHOLARONE™  
Manuscripts

1  
2 **Evaluation of a federally-funded mass media campaign and smoking cessation in pregnant**  
3 **women: a population-based study in three states**  
4  
5  
6

7 Lucinda England,<sup>1\*</sup> Van T. Tong,<sup>2</sup> Karilynn Rockhill,<sup>1</sup> Jason Hsia,<sup>1</sup> Tim McAfee,<sup>1</sup> Deesha Patel,<sup>1</sup>  
8 Katelin Rupp,<sup>3</sup> Elizabeth J Conrey,<sup>2,4</sup> Claudia Valdivieso,<sup>5</sup> Kevin C. Davis<sup>6</sup>  
9  
10

11 <sup>1</sup>Office on Smoking and Health, National Center for Chronic Disease Prevention and Health Promotion,  
12 Centers for Disease Control and Prevention, Atlanta, GA, USA

13 <sup>2</sup>Division of Reproductive Health, national Center for Chronic Disease Prevention and Health  
14 Promotion, Centers for Disease Control and Prevention, Atlanta, GA, USA

15 <sup>3</sup>Indiana State Department of Health, Tobacco Prevention and Cessation Commission, IN, USA

16 <sup>4</sup>Ohio Department of Health, Columbus, OH, USA

17 <sup>5</sup>Kentucky Department for Public Health, Frankfort, KY, USA

18 <sup>6</sup>Center for Health Policy Science and Tobacco, RTI International, Research Triangle Park, NC, USA  
19  
20

21 \*Corresponding author  
22

23 [lbe9@cdc.gov](mailto:lbe9@cdc.gov) (LJE)  
24  
25

26 *The findings and conclusions of this report are those of the authors and do not necessarily represent the*  
27 *official position of the Centers for Disease Control and Prevention. This study includes data by the Ohio*  
28 *Department of Health which should not be considered as an endorsement of this study or its*  
29 *conclusions.*  
30  
31  
32  
33  
34

35 Word count: 4005  
36

37 Key words: pregnancy, smoking cessation, mass media campaign  
38  
39  
40  
41  
42  
43  
44  
45  
46  
47  
48  
49  
50  
51  
52  
53  
54  
55  
56  
57  
58  
59  
60

## Abstract

### Objectives

In 2012, the Centers for Disease Control and Prevention initiated a national anti-smoking campaign, *Tips from Former Smokers (Tips)*. As a result of the campaign, quit attempts among smokers increased in the general population by 3.7 percentage points. In the current study, we assessed the effects of *Tips* on smoking cessation in pregnant women.

### Methods

We used 2009-2013 certificates of live births in three U.S. states: Indiana, Kentucky, and Ohio. Smoking cessation by the third trimester of pregnancy was examined among women who smoked in the three months pre-pregnancy. Campaign exposure was defined as overlap between the airing of *Tips* 2012 (March 19-June 10) and the pre-pregnancy and pregnancy periods. Women who delivered before *Tips* 2012 were not exposed. Adjusted logistic regression was used to determine whether exposure to *Tips* was independently associated with smoking cessation.

### Results

Cessation rates were stable during 2009-2011, but increased at the time *Tips* 2012 aired, and remained elevated. Overall, 32.9% of unexposed and 34.7% of exposed smokers quit by the third trimester ( $p < 0.001$ ). Exposure to *Tips* 2012 was associated with increased cessation (adjusted odds ratio: 1.07, 95% Confidence Interval: 1.05-1.10).

### Conclusions

Exposure to a national anti-smoking campaign for a general audience was associated with smoking cessation in pregnant women.

**Words: 206**

### Strengths and limitations of this study

- This is the first study to examine the association between a general mass media anti-tobacco campaign (*Tips from Former Smokers*) and smoking cessation in pregnant women.
- Women with live births in 3 states were examined; trimester-specific smoking status and temporal relationship to airing of the *Tips* campaign.

1  
2  
3  
4  
5  
6  
7  
8  
9  
10  
11  
12  
13  
14  
15  
16  
17  
18  
19  
20  
21  
22  
23  
24  
25  
26  
27  
28  
29  
30  
31  
32  
33  
34  
35  
36  
37  
38  
39  
40  
41  
42  
43  
44  
45  
46  
47  
48  
49  
50  
51  
52  
53  
54  
55  
56  
57  
58  
59  
60

- Analysis was an ecological time-series; we did not have information on exposure to the *Tips* campaign at the individual level.
- Smoking status was based on self-report contained in the birth certificate.

For peer review only

## Introduction

Tobacco use is a leading cause of preventable disease and death in the United States[1] and worldwide.[2] In 2012, the U.S. Centers for Disease Control and Prevention delivered a national anti-smoking campaign called *Tips from Former Smokers (Tips 2012)*. The campaign included graphic images of the health consequences of smoking, and reached an estimated 80% of U.S. cigarette smokers.[3] An evaluation of *Tips 2012* found that quit attempts among smokers increased in the general population, from 31.1% to 34.8% as a result of the campaign.[2] Of those who made a quit attempt, 13.4% were abstinent at follow up immediately after the campaign ended. Based on relapse survival-curve analysis, it is estimated that approximately half of those with short-term abstinence achieved long-term abstinence.[3] In the second *Tips* campaign, which aired in 2013, the effect of media dose on quit attempt rates was evaluated. Sixty-seven of 190 media markets were randomly selected to receive a higher dose media buy (3 times the media buy of the standard dose). [4] An evaluation of *Tips 2013* found the relative quit attempt rate was significantly higher in higher-dose markets (38.8%) than in standard-dose markets (34.9%).[5]

Smoking is a leading cause of infant disease and death in the U.S. An estimated 5.3%–7.7% of preterm deliveries, 13.1%–19.0% of term low birth weight deliveries, and 23.2%–33.6% of Sudden Infant Death Syndrome (SIDS) cases are attributable to prenatal smoking.[6] Despite the known adverse effects, prenatal smoking prevalence remains unacceptably high. In a population-based analysis in the U.S. from 2009-2011, nearly one-quarter (24%) of women with a recent live birth smoked in the three months before pregnancy, and 11% smoked during the last 3 months of pregnancy.[7] Furthermore, U.S. prenatal smoking prevalence and cessation rates have not improved appreciably over time.[7, 8] Currently available clinical cessation interventions for pregnant women are only modestly effective (with pooled relative risks for cessation less than 1.5), [9,10] and by themselves are unlikely to result in large changes in prenatal smoking at the population level.[11]

1  
2 To our knowledge, no studies have assessed the impact of a general anti-smoking campaign on smoking  
3  
4 cessation in pregnant women. To address this gap, we used U.S. birth certificate data from three  
5  
6 contiguous states to evaluate cessation rates in pregnant women before (2009-2011) and during the *Tips*  
7  
8 2012 campaign. We also assessed whether exposure to the *Tips* 2012 campaign was independently  
9  
10 associated with cessation after adjusting for potential confounders.  
11  
12

## 13 14 **Methods**

### 15 16 17 18 **Study design and setting**

19  
20 We performed an observational study of patterns of smoking cessation in pregnant women. Because the  
21  
22 current analysis necessitated state-level data-sharing and therefore could not be readily completed using  
23  
24 national data, we used birth certificates files for resident live births from three states: Indiana, Kentucky,  
25  
26 and Ohio, from 2009-2013. These states were selected based on the overall annual number of births, the  
27  
28 relatively high prevalence of cigarette smoking during pregnancy[12,13] and their geographical  
29  
30 proximity (the three states are geographically contiguous with overlapping *Tips* media markets). In  
31  
32 addition, none had introduced new state-level tobacco control programs at the time of the airing of *Tips*  
33  
34 2012.  
35  
36  
37  
38  
39

### 40 41 ***Tips* Media Campaign**

42  
43 *Tips* 2012 aired for 12 weeks, from March 19 through June 10, 2012, with sufficient media placement to  
44  
45 reach three-quarters of US adults on multiple occasions.[3] Advertisements appeared on television in all  
46  
47 U.S. media markets through a national buy of commercial advertising time on cable television networks.

48  
49 *Tips* 2012 had a ubiquitous national buy and a local “buy up” strategy in which the campaign was  
50  
51 broadcast through smaller local television channels in media markets with high cigarette smoking  
52  
53 prevalence. All three states included in our analysis had multiple markets that received the additional  
54  
55 local television ad buys. The total campaign dose was approximately 70% higher than the national  
56  
57  
58  
59  
60

1  
2 average dose in Ohio and Kentucky, and approximately 25% higher in Indiana. It is estimated that 80%  
3  
4 of U.S. cigarette smokers saw at least one *Tips* 2012 message, and that those who saw any advertisement  
5  
6 averaged 23 views over the 12-week period.[3]  
7  
8

### 9 10 **Campaign exposure**

11  
12 Exposure to the *Tips* campaign was defined as temporal overlap between each woman's pregnancy and  
13  
14 the preceding three months (pre-pregnancy), and airing of *Tips* 2012. A woman's date of conception and  
15  
16 the beginning dates for each trimester were calculated from the obstetric estimate of the gestational age  
17  
18 at delivery in completed weeks and from the infant's date of birth, which was ascertained directly from  
19  
20 the birth certificate. The 3-month period preceding her date of conception was then calculated. The date  
21  
22 3 months before conception and the date of delivery were compared with the dates of the *Tips* campaign  
23  
24 to determine temporal overlap. Women were categorized as "not exposed" to the campaign if they  
25  
26 delivered before the first day of the *Tips* 2012 campaign, and women were categorized as "exposed" to  
27  
28 the campaign if any day from the first date of the 3 months before conception through the end of the  
29  
30 second trimester overlapped with the airing of the *Tips* 2012 campaign. We included the 3 months  
31  
32 before conception in our exposure window because it aligned with the period of baseline smoking status  
33  
34 included in the birth certificate and because we felt it was reasonable to assume that women who viewed  
35  
36 the campaign in that time period would still remember the material after becoming pregnant.  
37  
38  
39  
40  
41  
42

43  
44 Intensity of exposure to the *Tips* campaign was assessed using weekly media market-level *Tips* gross  
45  
46 rating points (GRPs) for national and local television advertising as a continuous variable. GRPs are a  
47  
48 standard measure of advertising "dose" delivered to a given audience in a given media market and time  
49  
50 period, and are defined as the product of the percentage of the audience that is exposed (i.e., audience  
51  
52 reach) and the frequency with which that exposure occurs (i.e., the number of times ads are aired). GRPs  
53  
54 are calculated at the market level by Nielson Media Research based on TV viewership estimates. We  
55  
56 used women's cumulative *Tips* television GRPs in each designated market area (DMA).[14] Cumulative  
57  
58  
59  
60



1 GRPs were computed by summing the weekly GRPs in each DMA based on maternal county of  
2 residence at the time of delivery for the weeks during which the woman was exposed to the *Tips*  
3 campaign.  
4  
5  
6  
7

### 8 9 **Smoking Cessation**

10 The main outcome was smoking cessation by the third trimester of pregnancy among women who  
11 smoked in the three months before pregnancy, as recorded on the 2003 revision of the U.S. standard  
12 certificate of live birth.[15] On the birth certificate, cigarette smoking status is determined from four  
13 questions about the average number of cigarettes smoked per day in the three months before pregnancy  
14 and during each trimester of pregnancy. Our study population of pre-pregnancy smokers were women  
15 who reported smoking > 0 cigarettes per day in the three months before pregnancy. Cessation was  
16 defined as occurring in pre-pregnancy smokers who reported smoking 0 cigarettes per day in the third  
17 trimester.  
18  
19  
20  
21  
22  
23  
24  
25  
26  
27  
28  
29

### 30 31 **Covariates**

32 Co-variables were ascertained from the birth certificate and included following continuous and  
33 categorical variables: maternal age; race/ethnicity (non-Hispanic white, non-Hispanic African American,  
34 Hispanic, or other); education (less than high school, GED or high school diploma, some college or  
35 college graduate); marital status (married, unmarried); parity, Special Supplemental Nutrition Program  
36 for Woman, Infants and Children (WIC) enrollment (yes/no); pre-pregnancy body mass index (BMI);  
37 health insurance status (Medicaid, private insurance, self-pay/uninsured, or other [Indian Health Service,  
38 CHAMPUS/TRICARE, etc.]); state of maternal residence; and number of cigarettes smoked per day in  
39 the three months before pregnancy.  
40  
41  
42  
43  
44  
45  
46  
47  
48  
49  
50  
51  
52

### 53 54 **Analysis**

55 Trends in Cessation with Respect to Airing of the *Tips* Campaign  
56  
57  
58  
59  
60

1 All women who delivered in the study period and who smoked in the three months before pregnancy  
2 were included in the trend analysis. Crude and standardized cessation rates were calculated and plotted  
3  
4 were included in the trend analysis. Crude and standardized cessation rates were calculated and plotted  
5  
6 by delivery date in 3 month intervals for 2009 through 2013. Data were examined for the 3 states  
7  
8 individually and combined. We used jointpoint regression to identify the line segments with the best fit  
9  
10 across the study period for the combined data.[16] Cessation rates were standardized for four variables  
11  
12 that are established in the literature as being associated with cessation (some categories were collapsed  
13  
14 to assure adequate sample size in each stratum): maternal age (< 18, 18-34, and  $\geq$  35 years of age),  
15  
16 race/ethnicity (non-Hispanic white and other), education (< high school, high school, > high school),  
17  
18 and parity (first or higher order birth).[8, 17-19] Direct methods were used and were based on the 2009  
19  
20 first quarter population for each state for state-specific analyses, and for the combined 2009 first quarter  
21  
22 population for the combined analysis. Generalized linear models were used to generate a linear baseline  
23  
24 trend for the pre-campaign period (from January 1, 2009 through March 18, 2012). Because only 9  
25  
26 months separated the airing of the *Tips* 2012 and 2013 campaigns, the exposure period for most women  
27  
28 who delivered after March 18, 2012 (the first day of the *Tips* 2012 campaign) overlapped with *Tips* 2012  
29  
30 or *Tips* 2012 and 2013. Thus, few women who delivered after March 18, 2012 were unexposed to the  
31  
32 *Tips* campaign.

#### 33 Association between *Tips* Campaign Exposure and Smoking Cessation

34  
35 Smoking cessation in women categorized as exposed or not exposed to the *Tips* 2012 campaign were  
36  
37 examined using standardized rates and regression analysis in a subgroup of the study population from  
38  
39 the trend analysis. The study population was restricted for this analysis in the following ways: women  
40  
41 who were only exposed to *Tips* 2012 during the third trimester of pregnancy were excluded because of  
42  
43 the proximity of exposure to delivery, and women who became pregnant more than 3-months after *Tips*  
44  
45 2012 aired (post-campaign) were excluded because they were considered *not* exposed to *Tips* 2012.  
46  
47  
48  
49  
50  
51  
52  
53  
54  
55  
56  
57  
58  
59  
60

1 During our analysis, we noted that some women in our study who were exposed to *Tips* 2012 were also  
2 exposed to *Tips* 2013, which aired from March 4 through June 21, 2013, and featured content similar to  
3  
4  
5  
6  
7 *Tips* 2012 (neither campaign targeted pregnant women nor featured pregnancy-related health  
8  
9 outcomes).[3, 5] To address this, we created a separate set of mutually exclusive exposure variables for  
10  
11 a secondary analysis—not exposed to *Tips*, exposed to *Tips* 2012 only, and exposed to *Tips* 2012 and  
12  
13 *Tips* 2013. We did not conduct an analysis of women who were only exposed to *Tips* 2013 (women who  
14  
15 were previously excluded because they became pregnant more than 3 months after *Tips* 2012 aired),  
16  
17 because we did not have data for the full cohort of women, many of whom delivered in 2014.  
18  
19

20  
21 We compared demographic characteristics and cessation rates in unexposed and exposed women using  
22  
23 descriptive statistics. Standardized cessation rates were calculated using the methods previously  
24  
25 described to standardize for maternal age, race/ethnicity, education, and parity.  
26  
27

28  
29 Logistic regression was used to generate crude and adjusted odds ratios (ORs) and 95% confidence  
30  
31 intervals (CIs) for cessation in women exposed to the *Tips* campaign. In the unadjusted analysis, the  
32  
33 results were stratified by maternal demographic characteristics. In multivariate regression models,  
34  
35 results were adjusted for maternal age (continuous), race/ethnicity (non-Hispanic white, non-Hispanic  
36  
37 African American, Hispanic, or other), education (less than high school, GED or high school diploma,  
38  
39 some college or college graduate), marital status, parity (first or higher order birth), WIC enrollment,  
40  
41 pre-pregnancy BMI (underweight or  $<18.5 \text{ kg/m}^2$ , normal weight or  $18.5\text{-}24.9 \text{ kg/m}^2$ , overweight or  $25\text{-}$   
42  
43  $29.9 \text{ kg/m}^2$ , and obese or  $> 30 \text{ kg/m}^2$ );[20] insurance status (Medicaid, private insurance, self-  
44  
45 pay/uninsured, or other), state of residence, and the number of cigarettes smoked per day in the 3 months  
46  
47 before pregnancy (1-10, 11-20,  $<20$ ). Observations with missing co-variate values were excluded from  
48  
49 logistic regression, but represented less than 5% of the total. Separate models were constructed with  
50  
51 exposure as a dichotomous variable (unexposed and exposed to *Tips* 2012), a 3-level variable  
52  
53 (unexposed, exposed only to *Tips* 2012, and exposed to *Tips* 2012 and 2013), and as a continuous  
54  
55  
56  
57  
58  
59  
60

1  
2 variable based on cumulative GRPs for *Tips* 2012 and 2013 combined. We calculated ORs and 95% CIs  
3  
4 for every 600 GRP increase, or approximately 6 weeks of exposure at the national level (the average  
5  
6 cumulative exposure for the three-state area was 1857 GRPs).  
7  
8

### 9 10 Potential Changes in Misclassification of Smoking Status

11  
12 Pregnant women who smoke have high rates of nondisclosure.[21,22] Because we were concerned that  
13  
14 the airing of the *Tips* campaign could have increased nondisclosure among smokers (if smokers felt  
15  
16 more stigmatized after the campaign began airing), we sought to determine whether an increase in the  
17  
18 misclassification of continuing smokers as self-reported quitters could have occurred. Infant birth weight  
19  
20 is highly sensitive to tobacco smoke exposure,[23] and we assumed that an increase in misclassification  
21  
22 of active smokers as quitters would result in a lower mean birth weight among quitters in the *Tips*  
23  
24 exposed vs. the unexposed group. To assess this possibility, we compared mean birth weight among  
25  
26 quitters (obtained from birth certificates) with singleton deliveries using analysis of covariance. Mean  
27  
28 birth weight was adjusted for maternal age, race, education, marital status, parity, WIC enrollment, pre-  
29  
30 pregnancy BMI, insurance status, state of residence, and gestational age at delivery.  
31  
32  
33  
34  
35

36  
37 In all analyses, tests were two-sided, and  $\alpha$ -values of 0.05 were considered statistically significant.

38  
39 Statistical analyses were performed using SAS software, version 9.3 (SAS Institute Inc., Cary, NC,  
40  
41 USA) for Windows. This study was reviewed and approved as research by the Institutional Review  
42  
43 Boards of each state. This study was determined to be exempt from review as research without human  
44  
45 subjects by the Institutional Review Board at the Centers for Disease Control and Prevention.  
46  
47  
48

## 49 **Results**

### 50 51 52 **Sample Characteristics**

53  
54  
55 During the study period, there were 1,401,561 live births, of which 10,213 (0.7%) were excluded  
56  
57 because the 2003 revised birth certificate was not used or because smoking status or gestational age was  
58  
59  
60

1 missing (Figure 1). Of the 1,391,343 remaining, there were 894,258 births to women who were  
2 unexposed because they delivered before the *Tips* 2012 campaign; 209,053 births (23.4%) in this group  
3 were to women who smoked in the three months before pregnancy. There were 329,706 births to women  
4 whose pregnancies overlapped with the *Tips* 2012 (exposed); 73,582 (22.3%) of these smoked in the  
5 three months before pregnancy. Of these, 12,835 (17.4%) were exposed to *Tips* 2012 in the third  
6 trimester only, and so were excluded from further analysis. Thus, there were 60,747 births for inclusion  
7 in the analysis of the association between *Tips* campaign exposure and smoking cessation. Of these,  
8 13,610 (22.4%) were also exposed to *Tips* 2013.

### 21 **Trends in Cessation with Respect to Airing of the *Tips* Campaign**

22 During the pre-campaign period (from January 2009 through March 18, 2012) cessation rates among  
23 smokers who delivered before *Tips* 2012 aired remained flat. (Figure 2). Cessation rates then increased  
24 between the 12<sup>th</sup> and the 15<sup>th</sup> quarter, coinciding with the airing of *Tips* 2012 and reached a plateau by  
25 the end of *Tips* 2012. The plateau was sustained through the end of 2013. Analysis using joinpoint  
26 regression verified the number of significant jointpoints at the  $p = 0.05$  level.

27 When states were examined individually, trends in Ohio and Indiana resembled those using the  
28 aggregated data, but an increase in cessation that began approximately 1 quarter before *Tips* 2012 was  
29 observed in Kentucky (data not shown).

### 45 **Association between *Tips* Campaign Exposure and Smoking Cessation**

46 Demographic characteristics of women exposed and unexposed to the *Tips* campaign differed slightly  
47 but significantly for all variables examined (Table 1). Overall, 33.0% of unexposed smokers quit by the  
48 third trimester. In contrast, 34.8% of exposed smokers quit by the third trimester, an absolute increase of  
49 1.8 percentage points ( $p < 0.001$ ) (Table 2). Standardized cessation rates were 32.8% in unexposed  
50 women and 34.3% in exposed women, an absolute increase of 1.5 percentage points ( $p < 0.001$ ). For  
51  
52  
53  
54  
55  
56  
57  
58  
59  
60

1 individual states, there was a 0.9 percentage point increase in exposed vs. unexposed women for  
2  
3 Indiana, a 1.0 percentage point increase for Ohio, and a 3.4 percentage point increase for Kentucky.

4  
5 Cessation rates were significantly higher in exposed vs. unexposed women for nearly all subpopulations  
6  
7 examined. Significant increases in cessation rates were observed in all age groups, in all race/ethnicity  
8  
9 groups except Hispanic women, in all education categories, in married and unmarried women, in first  
10  
11 and higher order parity groups, in all BMI groups, in those enrolled in WIC and not enrolled, and in all  
12  
13 insurance categories except self-pay. Significant increases were also seen in women smoking 1-10  
14  
15 cigarettes/day before pregnancy and in those smoking  $\geq 21$  cigarettes/day, but not in those smoking 11-  
16  
17 20 cigarettes/day (data not shown).  
18  
19  
20  
21  
22  
23

24 In unadjusted regression models, cessation in smokers was significantly associated with *Tips 2012*  
25  
26 campaign exposure (OR 1.08, 95% CI 1.06-1.10) (Table 3). After adjustment for potential confounders,  
27  
28 results remained significant (AOR 1.07, 95% CI 1.05-1.10). Because the increase in cessation was  
29  
30 substantially higher in Kentucky than the other two states, the analysis was repeated after excluding  
31  
32 Kentucky. Results were attenuated, but remained significant (AOR 1.03, 95% CI 1.01-1.06). Including  
33  
34 exposure to *Tips 2013* in the model did not increase the odds of quitting (*Tips 2012* only: AOR 1.07  
35  
36 (95% CI 1.04-1.09); *Tips 2012* and 2013, AOR =1.06, 95% CI 1.01-1.10).  
37  
38  
39  
40  
41

42 On average, exposed women in our analysis were exposed to 176.6 GRPs per week. When *Tips 2012*  
43  
44 and 2013 exposure dose was examined as a continuous variable, the adjusted odds of quitting rose  
45  
46 significantly for each increase of 600 GRPs (AOR= 1.07, 95% CI 1.03-1.11).  
47  
48

### 49 **Potential Changes in Misclassification of Smoking Status**

50  
51 The mean crude and adjusted birthweights of infants born to women who quit smoking and were not  
52  
53 exposed to the campaign were not significantly different from those of infants born to women who quit  
54  
55 smoking and were exposed to the campaign (crude mean birthweight difference -5.2 g, 95% CI -14.1,  
56  
57  
58  
59  
60

1  
2 3.8; adjusted mean birthweight difference -2.0 g, 95% CI -9.0, 5.0) (Table 4). These findings did not  
3  
4 change when we restricted our analysis to term births (data not shown). Thus, we found no evidence of a  
5  
6 substantial change in the proportion of smokers misclassified as quitters after the *Tips* campaigns aired.  
7  
8

## 9 10 **Discussion**

11  
12 The *Tips* 2012 campaign was the first federally-funded mass-media anti-smoking campaign to air in the  
13  
14 U.S. It reached the majority of U.S. cigarette smokers and resulted in a 3.7 percentage point absolute  
15  
16 increase in quit attempts in a general population of smokers.[3] Although the campaign did not include  
17  
18 pregnancy-specific messages, we found that *Tips* 2012 was associated with increased cessation in  
19  
20 pregnant women. Furthermore, we observed cessation benefits across most subgroups, including  
21  
22 adolescents under 18 years of age, Medicaid-insured women, and women with less than a high school  
23  
24 education, and that media buy dose was positively associated with cessation rates. National ad  
25  
26 campaigns have the potential to improve public health not because they have large effects on quit rates,  
27  
28 but because they reach so many smokers. The *Tips* 2014 campaign increased the percentage of smokers  
29  
30 who quit by a modest 0.25 percentage points overall, but resulted in 104,000 additional quitters  
31  
32 nationally.[24] In our analysis, the percentage of smokers who had quit by the third trimester increased  
33  
34 by 1.8 percentage points, which compares favorably to national estimates for *Tips* and has the potential  
35  
36 to substantially reduce adverse tobacco-related pregnancy outcomes.  
37  
38  
39  
40  
41  
42  
43

44  
45 There are few studies in the U.S. or elsewhere which have formally evaluated the effects of anti-tobacco  
46  
47 campaigns in pregnant women. In 2001, the America Legacy Foundation launched a national campaign  
48  
49 targeting pregnant women called “Great Start,” which included television, radio, print, and website  
50  
51 components and established a quitline for pregnant women.[25] The campaign reached 26 million  
52  
53 television viewers and generated over 11,000 calls to the quit line.[25] However, the number of women  
54  
55 who quit smoking as a result of the campaign was not reported. A smaller social marketing campaign  
56  
57  
58  
59  
60

1 targeting African American women called “One Tiny Reason to Quit,” promoted the use of quitlines to  
2 pregnant women in Richmond, Virginia.[26] Post-campaign quitline calls from pregnant women  
3 increased significantly compared with pre-campaign calls, but again, effects on cessation rates were not  
4 assessed.[26] A mass media campaign conducted in 1994 throughout England targeting pregnant women  
5 resulted in a 14% increase in calls to quitlines from pregnant women, but no significant changes in  
6 prenatal smoking prevalence were documented.[27] Findings from the current study indicate that a  
7 graphic anti-smoking campaigns developed for a general audience could also increase cessation rates  
8 among pregnant women.

9  
10  
11  
12  
13  
14  
15  
16  
17  
18  
19  
20  
21 Our study has several strengths, including its novel topic and its large, population-based sample. Our  
22 study also has some limitations. First, our analysis was an ecological time series; we do not have data on  
23 exposure to the campaign at the individual level. However, previous studies have estimated that *Tips*  
24 reached about 80% of cigarette smokers [3] and it is likely that our population of pregnant women had  
25 high exposure levels as well. Inferences about potential causal effects of the campaign assume no other  
26 tobacco control efforts were implemented at or near the time the *Tips* 2012 campaign aired, and the  
27 possibility exists that an unrecognized factor might have affected cessation rates. The increase in  
28 cessation in Kentucky that slightly preceded the airing of *Tips* 2012 could have been the result of such  
29 an unrecognized factor. However, our research revealed no evidence of other large-scale media  
30 campaigns, interventions, or policy changes leading up to or during the *Tips* campaign in these three  
31 states.[3] The magnitude of the change in cessation rates, which took place following a period during  
32 which quarterly cessation rates had been flat for at least 3 years, provides additional support for a  
33 potential causal relationship. The increase in cessation rates was sustained through the end of 2013.  
34 Because *Tips* campaigns have aired each year since 2012, we currently do not have a post-campaign,  
35 unexposed population in which to determine whether cessation rates would return to pre-campaign  
36 levels. Other limitations include that quit status was not biochemically validated, which would be  
37  
38  
39  
40  
41  
42  
43  
44  
45  
46  
47  
48  
49  
50  
51  
52  
53  
54  
55  
56  
57  
58  
59  
60



1 problematic if non-disclosure increased after the introduction of the *Tips* campaign. However, we  
2 examined mean birth weight among infants of quitters by *Tips* exposure status and did not find evidence  
3 of increased misclassification. Our results apply to pregnancies ending in a live birth in three states and  
4 can't be generalized to the U.S. population or to pregnancies ending in miscarriage or stillbirth. The fact  
5 that cessation rates in Kentucky increased disproportionately after *Tips* 2012 was aired compared with  
6 Ohio and Indiana supports that effects of the campaign may vary by state. Kentucky had the highest  
7 smoking prevalence and the lowest quit rate during the baseline period, which could have contributed to  
8 its dramatic improvement in quit rates. Additional research is needed to address the effects of the *Tips*  
9 campaign on smoking cessation in pregnant women in other states and regions of the U.S. Finally,  
10 unlike the *Tips* 2013 campaign in which media markets were randomized to receive a higher or lower  
11 media buy, the national media buy for *Tips* 2012 was supplemented with broadcasts in smaller local  
12 television channels in media markets with high smoking prevalence.[3] Thus, our finding that cessation  
13 was positively associated with media buy dose could be the result of confounding.

14 It is unknown whether the 2012 *Tips* campaign was as effective among pregnant smokers as a campaign  
15 specifically targeting pregnant women would have been. Some qualitative studies,[25, 28] but not  
16 all,[29] have found that pregnant women prefer positive and empowering smoking cessation ads.  
17 However, it has not been established which types of ads actually increase cessation behavior and how  
18 they compare with one another. It is inefficient to mount a mass media campaign focused solely on  
19 pregnant women since pregnancy is temporary and incidence is spread out across the entire population  
20 of women of child-bearing age at a low frequency. Therefore, a general campaign that affects cessation  
21 rates in both general and pregnant populations could be more cost effective than a campaign only  
22 targeting pregnant women. More research is warranted to determine the optimal frequency and duration  
23 of a general campaign, as well as the demographic and geographic subpopulations of pregnant women

1  
2 who are most likely to benefit. Similar campaigns in other countries might also benefit pregnant women,  
3  
4 and inclusion of pregnant women in future evaluations of such programs should be considered.  
5  
6

7  
8 In conclusion, a general, national anti-smoking media campaign was associated with increased smoking  
9  
10 cessation in a pregnant population. Future research comparing effectiveness of campaigns designed to  
11  
12 target pregnant women with those targeting the general population could help inform the future  
13  
14 development, implementation, and sustainment of anti-smoking campaigns to benefit pregnant women.  
15  
16  
17  
18  
19  
20  
21  
22  
23  
24  
25  
26  
27  
28  
29  
30  
31  
32  
33  
34  
35  
36  
37  
38  
39  
40  
41  
42  
43  
44  
45  
46  
47  
48  
49  
50  
51  
52  
53  
54  
55  
56  
57  
58  
59  
60

1  
2 **Contributors:** All authors fulfill the authorship criteria recommended by the ICMJE. LJE conceived of  
3 the study, contributed to the analysis and interpretation of data, and drafted the paper. VTT co-designed  
4 the methods, and contributed to the analysis and interpretation of data. KR co-designed the methods, and  
5 conducted the analysis and contributed to the analysis and interpretation of data. JS co-designed the  
6 methods, provided statistical oversight, and contributed to the interpretation of data. TM contributed to  
7 the analysis and interpretation of data. DP contributed to the analysis and interpretation of data. KR  
8 contributed to the acquisition of data, analysis and interpretation of data. EJC contributed to the  
9 acquisition of data, analysis and interpretation of data. CV contributed to the acquisition of data, analysis  
10 and interpretation of data. KD contributed to the acquisition of data, analysis and interpretation of data,  
11 and provided statistical oversight. Each author contributed to drafting the manuscript or to critical  
12 revisions for intellectual content; and each approved the final version for publication. Each author takes  
13 final responsibility for the paper.  
14  
15  
16  
17  
18

19 **Funding:** This research received no specific grant from any funding agency. Data collection and  
20 analysis was supported by the Centers for Disease Control and Prevention. Seven of the authors of the  
21 manuscript were employed by the Centers for Disease Control and Prevention at the time the study was  
22 conducted.  
23  
24

25 **Competing interests:** None declared.  
26

#### 27 **Data sharing statement:**

28  
29 Data described as “not shown” is available from the author upon request. Please Contact Lucinda  
30 England, Centers for Disease Control and Prevention, lbe9@cdc.gov  
31  
32

33 GRP data are available upon request through the Centers for Disease Control and Prevention. Please  
34 contact Rebecca Murphy, Centers for Disease Control and Prevention [Rebecca.Murphy@cdc.hhs.gov](mailto:Rebecca.Murphy@cdc.hhs.gov)  
35  
36

37 State-level birth certificate data are available to researchers whose research proposals meet criteria set  
38 by each of the individual states. Please contact the Indiana State Department of Health  
39 ([KaRupp@isdh.in.gov](mailto:KaRupp@isdh.in.gov)) to request the release of Indiana birth certificate data. Please access the website:  
40 <http://chfs.ky.gov/os/omb/irb/> for information on how to request Kentucky birth certificate data. Please  
41 access the website: <http://www.odh.ohio.gov/en/healthstats/irb/irb.aspx> for information on how to  
42 request Ohio birth certificate data.  
43  
44  
45  
46  
47  
48  
49  
50  
51  
52  
53  
54  
55  
56  
57  
58  
59  
60

## References

- 1 [1] U.S. Department of Health and Human Services. The Health Consequences of Smoking--50  
2 Years of Progress: A Report of the Surgeon General. Atlanta, GA: U.S. Department of Health and  
3 Human Services, Centers for Disease Control and Prevention, National Center for Chronic  
4 Disease Prevention and Health Promotion, Office on Smoking and Health 2014.
- 5 [2] World Health Organization. WHO Global Report: Mortality Attributable to Tobacco. 2012.  
6 [http://apps.who.int/iris/bitstream/10665/44815/1/9789241564434\\_eng.pdf](http://apps.who.int/iris/bitstream/10665/44815/1/9789241564434_eng.pdf) (Accessed 28 Feb  
7 2017)
- 8 [3] McAfee T, Davis KC, Alexander RL, et al. Effect of the first federally funded US antismoking  
9 national media campaign. *Lancet* 2013;382(9909):2003-2011.
- 10 [4] Centers for Disease Control and Prevention. Impact of a national tobacco education campaign on  
11 weekly numbers of quitline calls and website visitors--United States, March 4-June 23, 2013.  
12 *Morb Mortal Wkly Rep* 2013;62(37):763-767.
- 13 [5] McAfee T, Davis KC, Shafer P, et al. Increasing the dose of television advertising in a national  
14 antismoking media campaign: results from a randomised field trial. *Tob Control* 2017;26:19-28.
- 15 [6] Dietz PM, England LJ, Shapiro-Mendoza CK, Tong VT, Farr SL, Callaghan WM. Infant  
16 morbidity and mortality attributable to prenatal smoking in the U.S. *Am J Prev Med*  
17 2010;39(1):45-52.
- 18 [7] Rockhill KM, Tong VT, Farr SL, et al. Postpartum Smoking Relapse After Quitting During  
19 Pregnancy: Pregnancy Risk Assessment Monitoring System, 2000-2011. *J Women's Health*  
20 (2002) 2015.
- 21 [8] Tong VT, Dietz PM, Morrow B, et al. Trends in smoking before, during, and after pregnancy--  
22 Pregnancy Risk Assessment Monitoring System, United States, 40 sites, 2000-2010. *Morb*  
23 *Mortal Wkly Rep Surveill Sum (Washington, DC : 2002)* 2013;62(6):1-19.
- 24 [9] Coleman T, Chamberlain C, Davey MA, et al. Pharmacological interventions for promoting  
25 smoking cessation during pregnancy. *Cochrane Database Syst Rev* 2015(12):Cd010078.
- 26 [10] Chamberlain C, O'Mara-Eves A, Porter J, et al. Psychosocial interventions for supporting women  
27 to stop smoking in pregnancy. *Cochrane Database Syst Rev* 2017;2:Cd001055.
- 28 [11] Kim SY, England LJ, Kendrick JS, et al. The contribution of clinic-based interventions to reduce  
29 prenatal smoking prevalence among US women. *Am J Public Health* 2009;99(5):893-898.
- 30 [12] Curtin SC, Mathews TJ. Smoking prevalence and cessation before and during pregnancy: Data  
31 from the birth certificate, 2014. National Center for Health Statistics. Hyattsville, MD 2016.
- 32 [13] Hamilton BE, Martin JA, Osterman MJK, et al. Births: Final data for 2014. National Vital  
33 Statistics Reports; vol 64 no 12. Hyattsville, MD: National Center for Health Statistics 2015.
- 34 [14] Shafer PR, Davis KC, Patel D, et al. Association Between Media Dose, Ad Tagging, and  
35 Changes in Web Traffic for a National Tobacco Education Campaign: A Market-Level  
36 Longitudinal Study. *J Med Internet Res* 2016;18(2):e39.
- 37 [15] Centers for Disease Control and Prevention. Guide to Completing the Facility Worksheets for the  
38 Certificate of Live Birth and Report of Fetal Death. 2003.  
39 <http://www.cdc.gov/nchs/data/dvs/guidetocompletefacilitywks.pdf> (Accessed 12 Nov 2016)
- 40 [16] Kim HJ, Fay MP, Feuer EJ, et al. Permutation tests for joinpoint regression with applications to  
41 cancer rates. *Stat Med* 2000;19(3):335-351.
- 42 [17] Kandel DB, Griesler PC, Schaffran C. Educational attainment and smoking among women: risk  
43 factors and consequences for offspring. *Drug and alcohol dependence* 2009;104 Suppl 1:S24-33.
- 44 [18] Graham H, Hawkins SS, Law C. Lifecourse influences on women's smoking before, during and  
45 after pregnancy. *Soc Sci Med* 2010;70(4):582-587.
- 46 [19] Lu Y, Tong S, Oldenburg B. Determinants of smoking and cessation during and after pregnancy.  
47 *Health Promot Int* 2001;16(4):355-365.

- 1  
2 [20] World Health Organization. Obesity: Preventing and Managing the Global Epidemic. Report of a  
3 WHO Consultation. 2000. Report no.: 894. Available at:  
4 [http://www.who.int/nutrition/publications/obesity/WHO\\_TRS\\_894/en/](http://www.who.int/nutrition/publications/obesity/WHO_TRS_894/en/). (Accessed 26 Mar 2017)  
5 [21] Dietz PM, Homa D, England LJ, et al. Estimates of nondisclosure of cigarette smoking among  
6 pregnant and nonpregnant women of reproductive age in the United States. *Am J Epidemiol*  
7 2011;173(3):355-359.  
8 [22] England LJ, Grauman A, Qian C, et al. Misclassification of maternal smoking status and its  
9 effects on an epidemiologic study of pregnancy outcomes. *Nicotine Tob Res* 2007;9(10):1005-  
10 1013.  
11 [23] England LJ, Kendrick JS, Gargiullo PM, et al. Measures of maternal tobacco exposure and infant  
12 birth weight at term. *Am J Epidemiol* 2001;153(10):954-960.  
13 [24] Neff LJ, Patel D, Davis K, et al. Evaluation of the national Tips from Former Smokers campaign:  
14 the 2014 longitudinal cohort. *Prev Chronic Dis* 2016;13:E42.  
15 [25] Haviland L, Thornton AH, Carothers S, et al. Giving infants a great start: launching a national  
16 smoking cessation program for pregnant women. *Nicotine Tob Res* 2004;6 Suppl 2:S181-188.  
17 [26] Kennedy MG, Genderson MW, Sepulveda AL, et al. Increasing tobacco quitline calls from  
18 pregnant african american women: the "One tiny reason to quit" social marketing campaign. *J*  
19 *Women's Health* (2002) 2013;22(5):432-438.  
20 [27] Champion P, Owen L, McNeill A, et al. Evaluation of a mass media campaign on smoking and  
21 pregnancy. *Addiction*. 1994;89(10):1245-54.  
22 [28] Schar EH, Gutierrez KK. Smoking cessation media campaigns from around the world:  
23 Recommendations from lessons learned. Copenhagen, Denmark: World Health Organization  
24 Regional Office for Europe; 2001.  
25 [29] Hoek J, Gifford H, Maubach N, et al. A qualitative analysis of messages to promote smoking  
26 cessation among pregnant women. *BMJ Open* 2014;4(11):e006716.  
27  
28  
29  
30  
31  
32  
33  
34  
35  
36  
37  
38  
39  
40  
41  
42  
43  
44  
45  
46  
47  
48  
49  
50  
51  
52  
53  
54  
55  
56  
57  
58  
59  
60

Figure 1. Flow chart for study inclusion, Indiana, Kentucky, Ohio, 2009-2013

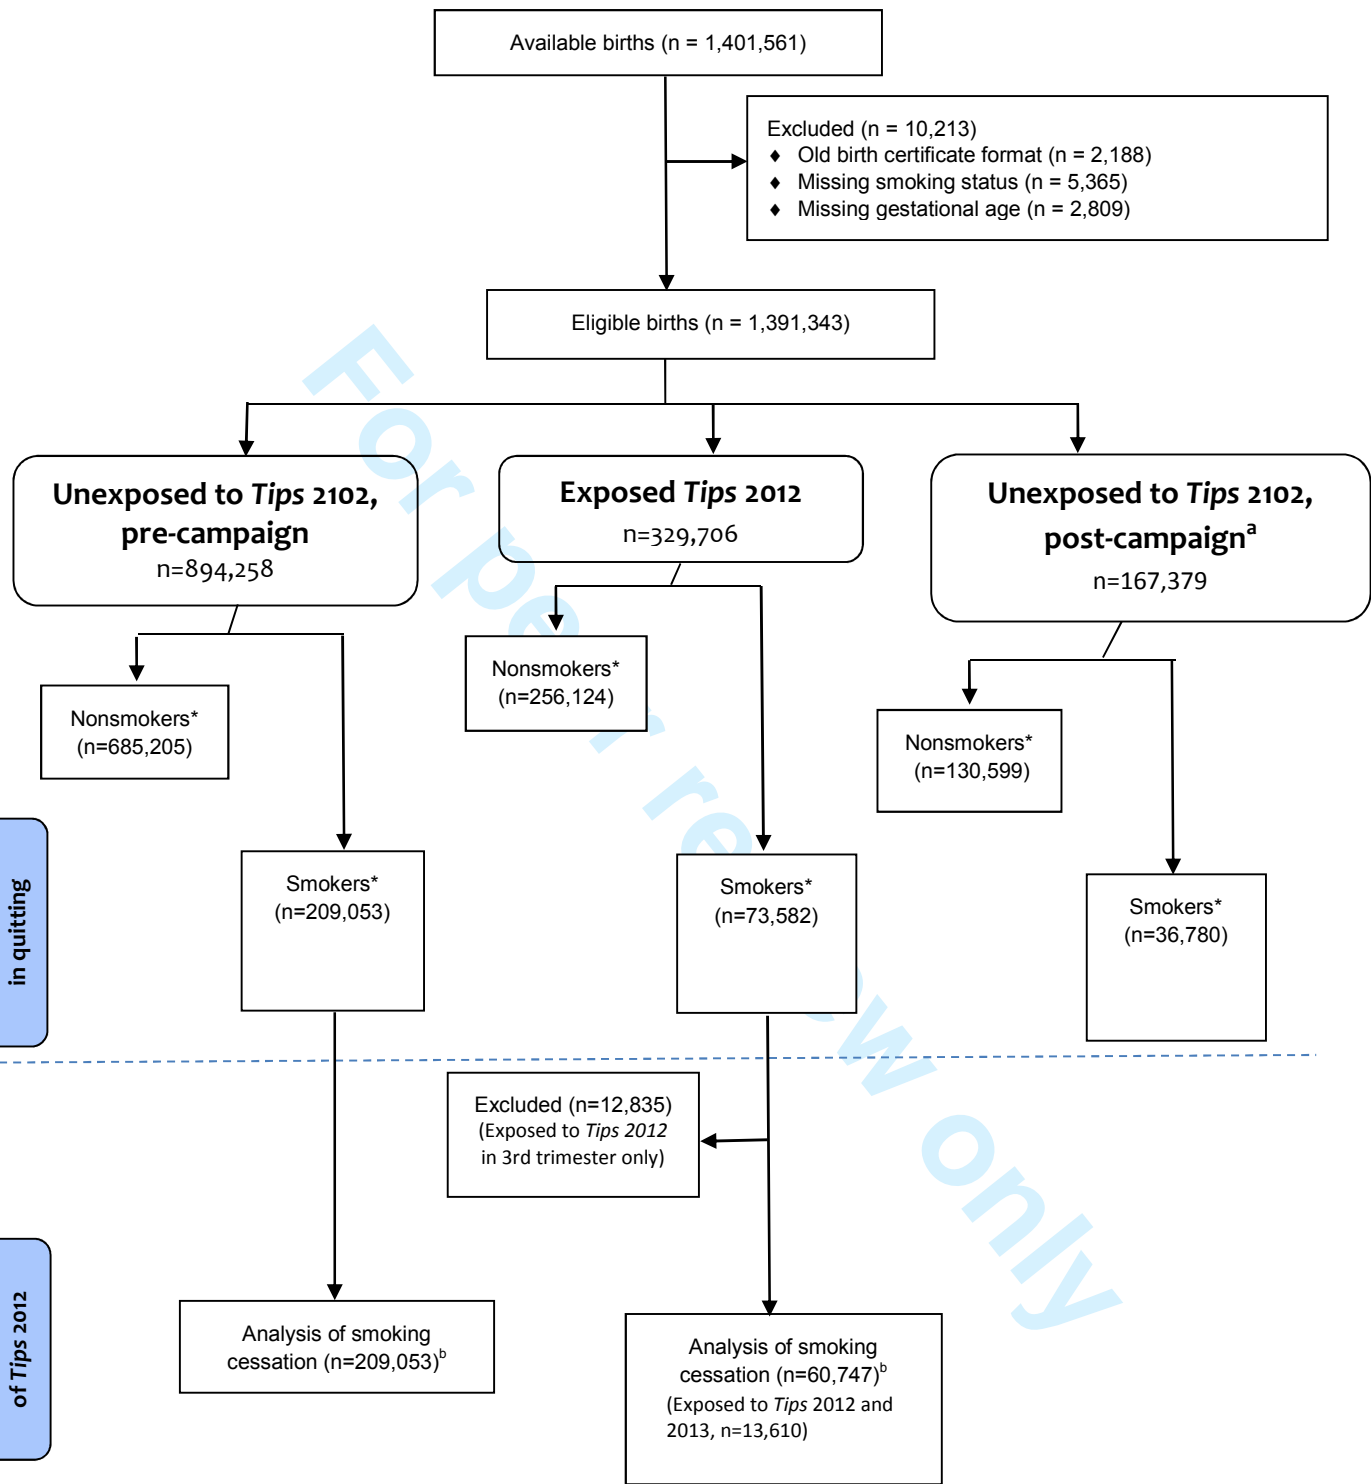

<sup>a</sup> Became pregnant more than 3 months after *Tips* 2012, exposed to *Tips* 2013 only.

<sup>b</sup> Non-smokers were those who reported no smoking during the 3 months before pregnancy; smokers were those who reported any smoking in the 3 months before pregnancy (source: Of n=60,747, 13,610 women (22.4%) were exposed to *Tips* 2012 and *Tips* 2013. When examining birthweight, only singleton births with no birth defects were analyzed (pre-campaign, n=201,030; during campaign, n=58,231).

Figure 2. Trends in smoking cessation rates<sup>a</sup> among women who smoked in the 3 months before pregnancy (crude) Indiana, Kentucky, Ohio, 2009-2013.

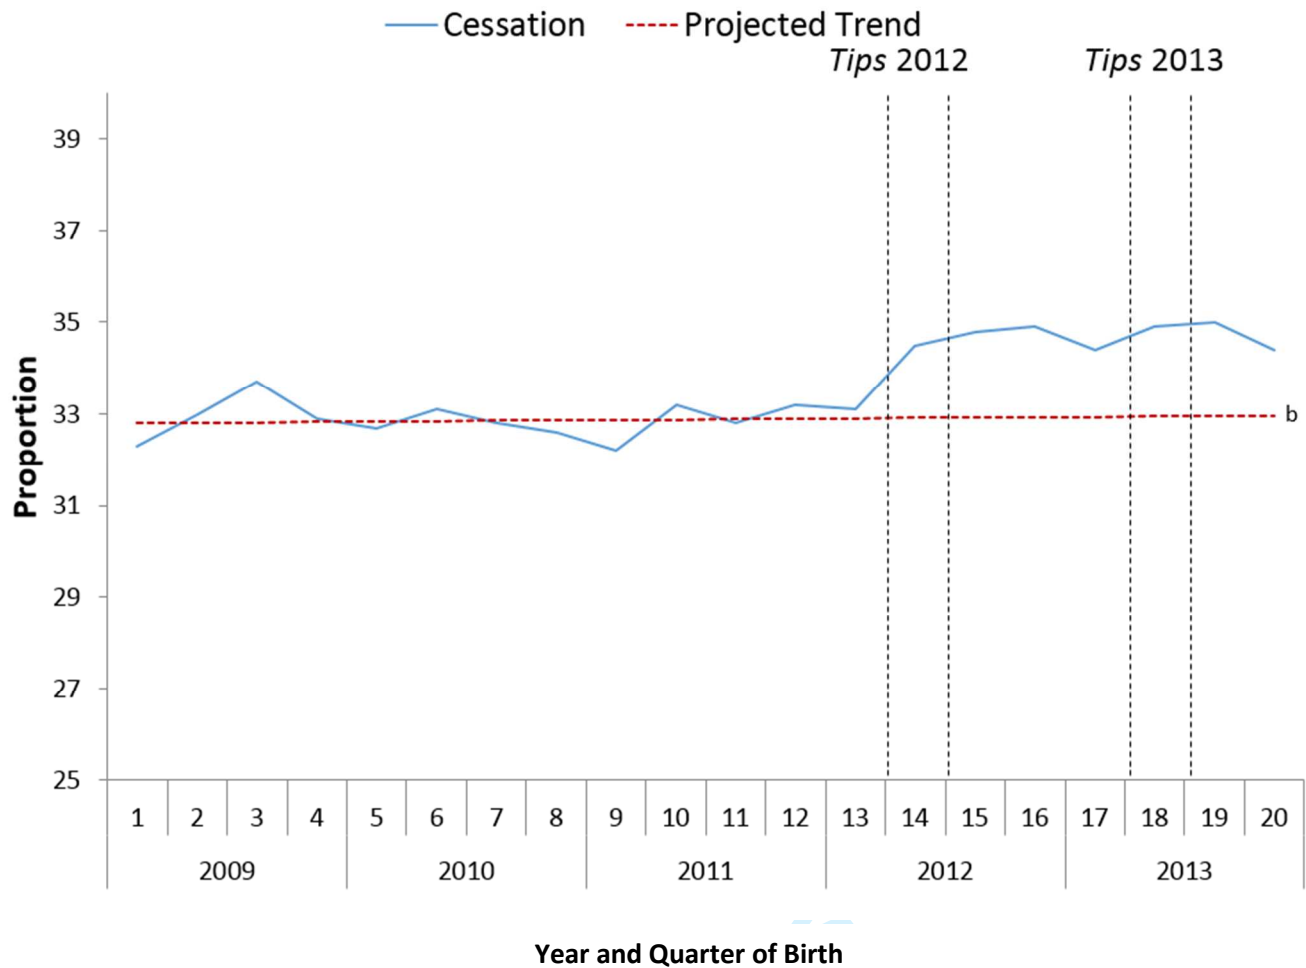

<sup>a</sup> The percentage of women who reported smoking >0 cigarettes per day for the three months before pregnancy and then reported smoking 0 cigarettes per day during the third trimester of pregnancy.

<sup>b</sup> Projected cessation trend using PROC GLM and pre-campaign data from January 1, 2009 through March 18, 2012, and extrapolated for 2012-2013 (intercept= 32.8; slope = 0.009). The *Tips 2012* campaign ran from March 19-June 10, 2012, and *Tips 2013* ran from March 4-June 24, 2013.

**Table 1. Characteristics of women who smoked in the 3 months before pregnancy, by exposure to *Tips* 2012. Indiana, Kentucky, Ohio, 2009-2013.**

|                                       | Unexposed <sup>b</sup> | Exposed <sup>c</sup> | P-value <sup>d</sup> |
|---------------------------------------|------------------------|----------------------|----------------------|
| Maternal characteristics <sup>a</sup> | (n= 209,053)           | (n= 60,747)          |                      |
| <b>Mean maternal age (yrs)</b>        | 25.2 (±5.3)            | 25.6 (±5.3)          | <.0001               |
| <b>Maternal race/ethnicity</b>        |                        |                      |                      |
| White, non-Hispanic                   | 86.5                   | 86.1                 | <.0001               |
| Black, non-Hispanic                   | 10.3                   | 10.3                 |                      |
| Hispanic                              | 2.3                    | 2.4                  |                      |
| Other                                 | 0.9                    | 1.2                  |                      |
| <b>Maternal education</b>             |                        |                      |                      |
| < High school                         | 27.0                   | 24.3                 | <.0001               |
| High school or GED                    | 38.0                   | 37.9                 |                      |
| College or graduate                   | 35.0                   | 37.8                 |                      |
| <b>Marital status</b>                 |                        |                      |                      |
| Married                               | 33.1                   | 31.7                 | <.0001               |
| Unmarried                             | 66.9                   | 68.3                 |                      |
| <b>Parity</b>                         |                        |                      |                      |
| First birth                           | 38.5                   | 37.2                 | <.0001               |
| Second or later birth                 | 61.5                   | 62.8                 |                      |
| Missing <sup>d</sup>                  |                        |                      |                      |
| <b>WIC enrollment</b>                 |                        |                      |                      |
| No                                    | 32.7                   | 33.6                 | <.0001               |
| Yes                                   | 67.3                   | 66.4                 |                      |
| <b>Pre-pregnancy BMI</b>              |                        |                      |                      |
| Underweight (<18.5)                   | 6.9                    | 6.6                  | <.0001               |
| Normal Weight (18.5-24.9)             | 44.6                   | 43.6                 |                      |
| Overweight (25-29.9)                  | 23.1                   | 23.4                 |                      |



|    |                                     |      |      |        |
|----|-------------------------------------|------|------|--------|
| 1  |                                     |      |      |        |
| 2  | <b>Insurance status<sup>j</sup></b> |      |      |        |
| 3  |                                     |      |      |        |
| 4  | Medicaid                            | 67.4 | 67.3 | 0.0261 |
| 5  |                                     |      |      |        |
| 6  | Private insurance                   | 23.7 | 24.1 |        |
| 7  |                                     |      |      |        |
| 8  | Self-pay                            | 2.2  | 2.3  |        |
| 9  |                                     |      |      |        |
| 10 | Other                               | 6.7  | 6.4  |        |
| 11 |                                     |      |      |        |
| 12 | <b>State</b>                        |      |      |        |
| 13 |                                     |      |      |        |
| 14 | Indiana                             | 27.5 | 26.9 | <.0001 |
| 15 |                                     |      |      |        |
| 16 | Kentucky                            | 21.7 | 23.3 |        |
| 17 |                                     |      |      |        |
| 18 | Ohio                                | 50.7 | 49.8 |        |
| 19 |                                     |      |      |        |
| 20 | <b>Cigarette smoked per day</b>     |      |      |        |
| 21 | <b>before pregnancy</b>             |      |      |        |
| 22 |                                     |      |      |        |
| 23 | 1-10                                | 21.0 | 22.6 | <.0001 |
| 24 |                                     |      |      |        |
| 25 | 11-20                               | 30.7 | 31.8 |        |
| 26 |                                     |      |      |        |
| 27 | ≥21                                 | 48.3 | 45.5 |        |
| 28 |                                     |      |      |        |

30 <sup>a</sup> Missing values not included in column totals: maternal age 0.1%, race/ethnicity 0%, education 0.7%, marital status 0.3%, parity 0%, WIC enrollment 0.6%, BMI 2.2%, insurance 1.3%, state 0%, cigarettes/day 0%.

31 <sup>b</sup> Women who delivered prior to the *Tips* 2012 campaign (January 1, 2009 to March 18, 2012).

32 <sup>c</sup> Women for whom there was temporal overlap between the *Tips* 2012 campaign and the period including her pregnancy and the preceding three months. Women only exposed during the third trimester were excluded.

33 <sup>d</sup> Proc regress used for continuous variable (age); and chi-square test used for categorical variables.

34

35

36

37

38

39

40

41

42

43

44

45

46

47

48

49

50

51

52

53

54

55

56

57

58

59

60

**Table 2. Cessation rates<sup>a</sup> in women who smoked in the 3 months before pregnancy by exposure status to the *Tips* 2012 campaign, crude and standardized. Indiana, Kentucky, Ohio, 2009-2013.**

|         | Crude     |         |            |            | Standardized <sup>b</sup> |         |            |            |
|---------|-----------|---------|------------|------------|---------------------------|---------|------------|------------|
|         | Unexposed | Exposed | Absolute % | Relative % | Unexposed                 | Exposed | Absolute % | Relative % |
| IN      | 32.2      | 33.5    | 1.3        | 3.9        | 32.1                      | 33.0    | 0.9        | 2.7        |
| KY      | 21.9      | 26.3    | 4.4        | 20.3       | 21.7                      | 25.1    | 3.4        | 15.6       |
| OH      | 38.2      | 39.4    | 1.3        | 3.4        | 37.8                      | 38.8    | 1.0        | 2.6        |
| Overall | 33.0      | 34.8    | 1.8        | 5.4        | 32.8                      | 34.3    | 1.5        | 4.4        |
| IN + OH | 36.1      | 37.4    | 1.3        | 3.6        | 35.8                      | 36.8    | 0.9        | 2.6        |

<sup>a</sup>The percentage of women who reported smoking > 0 cigarettes per day for the three months before pregnancy and then reported smoking 0 cigarettes per day during the third trimester of pregnancy.

<sup>b</sup>Standardized for maternal age, race/ethnicity, education, and parity using direct methods based on the 2009 first quarter population for each state for state-specific analyses, and for the combined 2009 first quarter population for the combined analysis.

**Table 3. Proportion and odds ratio of smoking cessation by last trimester among women who were smoking in 3 months before pregnancy and pregnant before or during a national media campaign. Indiana, Kentucky, Ohio, 2009-2013.**

|                                                | Pre-campaign <sup>a</sup><br>(n= 209,053) | During<br>campaign <sup>b</sup><br>(n= 60,747) | P-value | Crude OR<br>(95% CI) | Adjusted OR<br>(95% CI) <sup>c</sup> |
|------------------------------------------------|-------------------------------------------|------------------------------------------------|---------|----------------------|--------------------------------------|
| <b>Smoking cessation<br/>by last trimester</b> | 32.9%                                     | 34.7%                                          | <.0001  | 1.08 (1.06-1.10)     | 1.07 (1.05-1.10)                     |

<sup>a</sup> Women who smoked in the 3 months before pregnancy and delivered prior to the *Tips* 2012 campaign (January 1, 2009 to March 18, 2012).

<sup>b</sup> Women who smoked in the 3 months before pregnancy and for whom there was temporal overlap between the *Tips* 2012 campaign and the period including her pregnancy (1<sup>st</sup> and 2<sup>nd</sup> trimesters) and the preceding three months.

<sup>c</sup> Adjusted for maternal age, race, education, marital status, parity, WIC enrollment, pre-pregnancy BMI, insurance status, state, and cigarettes smoked before pregnancy (n=256,886).

**Table 4. Unadjusted and adjusted mean birth weight (grams) among quitters, before and during the *Tips* campaign. Indiana, Kentucky, Ohio, 2009-2013.**

| Exposure                                                        | Women who quit smoking by the third trimester |                           |                       |                          |
|-----------------------------------------------------------------|-----------------------------------------------|---------------------------|-----------------------|--------------------------|
|                                                                 | Unadjusted                                    |                           | Adjusted <sup>a</sup> |                          |
|                                                                 | Mean birth weight                             | Mean difference           | Mean birth weight     | Mean difference          |
| <b>Unexposed<br/>(pre-campaign)<br/>(n= 65,658)<sup>b</sup></b> | 3309                                          | -5.2<br>95% CI -14.1, 3.8 | 3228                  | -2.0<br>95% CI -9.0, 5.0 |
| <b>Exposed<br/>(during campaign)<br/>(n=20,092)<sup>c</sup></b> | 3314                                          |                           | 3230                  |                          |

<sup>a</sup> Adjusted for maternal age, race, education, marital status, parity, WIC enrollment, pre-pregnancy BMI, insurance status, state, and gestational age.

<sup>b</sup> Births to women who smoked in the 3 months before pregnancy and delivered prior to the *Tips* 2012 campaign (January 1, 2009 to March 18, 2012).

<sup>c</sup> Births to women who smoked in the 3 months before pregnancy and for whom there was temporal overlap between the *Tips* 2012 campaign and the period including her pregnancy (1<sup>st</sup> and 2<sup>nd</sup> trimesters) and the preceding three months.

## STROBE Checklist

**Evaluation of a federally-funded mass media campaign and smoking cessation in pregnant women: a population-based study in three states**

|                              |                                                                     |                                                                                                                                                                                                                                                                                                                                                                                                                                                                                              |
|------------------------------|---------------------------------------------------------------------|----------------------------------------------------------------------------------------------------------------------------------------------------------------------------------------------------------------------------------------------------------------------------------------------------------------------------------------------------------------------------------------------------------------------------------------------------------------------------------------------|
| Title and abstract           | Page<br>1                                                           | ✓ Indicate the study's design with commonly used terms in the title or abstract                                                                                                                                                                                                                                                                                                                                                                                                              |
|                              | 2                                                                   | ✓ Provide in the abstract an informative and balanced summary of what was done and what was found                                                                                                                                                                                                                                                                                                                                                                                            |
| Introduction                 |                                                                     |                                                                                                                                                                                                                                                                                                                                                                                                                                                                                              |
| Background/rationale         | 4-5                                                                 | ✓ Explain the scientific background and rationale for the investigation being reported                                                                                                                                                                                                                                                                                                                                                                                                       |
| <b>Methods</b>               |                                                                     |                                                                                                                                                                                                                                                                                                                                                                                                                                                                                              |
| Study design                 | 5-8                                                                 | ✓ Present key elements early in the paper                                                                                                                                                                                                                                                                                                                                                                                                                                                    |
| Setting                      | (a) 5<br>(b) 5<br>(c) 5,8<br>(d) n/a<br>(e) 6,7<br>(f) 5<br>(g) 5-7 | ✓ Describe (a) settings, (b) locations, (c) relevant dates, (d) periods of recruitment, (e) exposure, (f) follow up, and (g) data collection                                                                                                                                                                                                                                                                                                                                                 |
| Participants                 | (a)5-8, 19<br>(b) 5-8, 19<br>(c) n/a                                | <p>✓ <i>Cohort study</i>—Give the (a) eligibility criteria, and (b) the sources and methods of selection of participants. (c) Describe methods of follow-up</p> <p><i>Case-control study</i>—Give the eligibility criteria, and the sources and methods of case ascertainment and control selection. Give the rationale for the choice of cases and controls</p> <p><i>Cross-sectional study</i>—Give the eligibility criteria, and the sources and methods of selection of participants</p> |
|                              | n/a                                                                 | <p>(b) <i>Cohort study</i>—For matched studies, give matching criteria and number of exposed and unexposed</p> <p><i>Case-control study</i>—For matched studies, give matching criteria and the number of controls per case</p>                                                                                                                                                                                                                                                              |
| Variables                    | (a)5-7<br>(b)n/a                                                    | ✓ (a) Clearly define all outcomes, exposures, predictors, potential confounders, and effect modifiers. (b) Give diagnostic criteria, if applicable                                                                                                                                                                                                                                                                                                                                           |
| Data sources/<br>measurement | (a)5-7<br>(b)n/a                                                    | ✓ (a) For each variable of interest, give sources of data and details of methods of assessment (measurement). (b) Describe comparability of assessment methods if there is more than one group                                                                                                                                                                                                                                                                                               |
| Bias                         | 9-10                                                                | ✓ Describe any efforts to address potential sources of bias                                                                                                                                                                                                                                                                                                                                                                                                                                  |
| Study size                   | 5                                                                   | ✓ Explain how the study size was arrived at                                                                                                                                                                                                                                                                                                                                                                                                                                                  |
| Quantitative<br>variables    | 7-10                                                                | ✓ Explain how quantitative variables were handled in the analyses. If applicable, describe which groupings were chosen and why                                                                                                                                                                                                                                                                                                                                                               |
|                              | 7-10                                                                | ✓ Describe all statistical methods, including those used to control for confounding                                                                                                                                                                                                                                                                                                                                                                                                          |
|                              | 10                                                                  | ✓ Describe any methods used to examine subgroups and interactions                                                                                                                                                                                                                                                                                                                                                                                                                            |
|                              | 9                                                                   | ✓ Explain how missing data were addressed                                                                                                                                                                                                                                                                                                                                                                                                                                                    |

|                   |            |                                                                                                                                                                                                            |
|-------------------|------------|------------------------------------------------------------------------------------------------------------------------------------------------------------------------------------------------------------|
|                   | n/a        | <i>Cohort study</i> —If applicable, explain how loss to follow-up was addressed                                                                                                                            |
|                   | n/a        | <i>Case-control study</i> —If applicable, explain how matching of cases and controls was addressed                                                                                                         |
|                   | n/a        | <i>Cross-sectional study</i> —If applicable, describe analytical methods taking account of sampling strategy                                                                                               |
|                   | n/a        | Describe any sensitivity analyses                                                                                                                                                                          |
| <b>Results</b>    |            |                                                                                                                                                                                                            |
| Participants      | 10-11, 19  | ✓ Report numbers of individuals at each stage of study—eg numbers potentially eligible, examined for eligibility, confirmed eligible, included in the study, completing follow-up, and analysed            |
|                   | 10-11, 19  | ✓ Give reasons for non-participation at each stage                                                                                                                                                         |
|                   | 19         | ✓ Consider use of a flow diagram                                                                                                                                                                           |
| Descriptive data  | 19, 21-22  | ✓ Give characteristics of study participants (eg demographic, clinical, social) and information on exposures and potential confounders                                                                     |
|                   | 9, 23      | ✓ Indicate number of participants with missing data for each variable of interest                                                                                                                          |
|                   | n/a        | <i>Cohort study</i> —Summarise follow-up time (eg, average and total amount)                                                                                                                               |
| Outcome data      | 11, 21, 23 | ✓ <i>Cohort study</i> —Report numbers of outcome events or summary measures over time                                                                                                                      |
|                   | 21-22      | <i>Case-control study</i> —Report numbers in each exposure category, or summary measures of exposure                                                                                                       |
|                   | n/a        | <i>Cross-sectional study</i> —Report numbers of outcome events or summary measures                                                                                                                         |
| Main results      | 23, 24     | ✓ Give unadjusted estimates and, if applicable, confounder-adjusted estimates and their precision (eg, 95% confidence interval). Make clear which confounders were adjusted for and why they were included |
|                   | 21, 22     | ✓ Report category boundaries when continuous variables were categorized                                                                                                                                    |
|                   | 23         | ✓ If relevant, consider translating estimates of relative risk into absolute risk for a meaningful time period                                                                                             |
| Other analyses    | 12, 24     | ✓ Report other analyses done—eg analyses of subgroups and interactions, and sensitivity analyses                                                                                                           |
| <b>Discussion</b> |            |                                                                                                                                                                                                            |
| Key results       | 13         | ✓ Summarise key results with reference to study objectives                                                                                                                                                 |
| Limitations       | 14,15      | ✓ Discuss limitations of the study, taking into account sources of potential bias or imprecision. Discuss both direction and magnitude of                                                                  |

|                          |       |                                                                                                                                                                              |
|--------------------------|-------|------------------------------------------------------------------------------------------------------------------------------------------------------------------------------|
|                          |       | any potential bias                                                                                                                                                           |
| Interpretation           | 15,16 | ✓ Give a cautious overall interpretation of results considering objectives, limitations, multiplicity of analyses, results from similar studies, and other relevant evidence |
| Generalizability         | 14,15 | ✓ Discuss the generalisability (external validity) of the study results                                                                                                      |
| <b>Other information</b> |       |                                                                                                                                                                              |
| Funding                  | 17    | ✓ Give the source of funding and the role of the funders for the present study and, if applicable, for the original study on which the present article is based              |

For peer review only

# BMJ Open

## Evaluation of a federally-funded mass media campaign and smoking cessation in pregnant women: a population-based study in three states

|                                 |                                                                                                                                                                                                                                                                                                                                                                                                                                                                                                       |
|---------------------------------|-------------------------------------------------------------------------------------------------------------------------------------------------------------------------------------------------------------------------------------------------------------------------------------------------------------------------------------------------------------------------------------------------------------------------------------------------------------------------------------------------------|
| Journal:                        | <i>BMJ Open</i>                                                                                                                                                                                                                                                                                                                                                                                                                                                                                       |
| Manuscript ID                   | bmjopen-2017-016826.R1                                                                                                                                                                                                                                                                                                                                                                                                                                                                                |
| Article Type:                   | Research                                                                                                                                                                                                                                                                                                                                                                                                                                                                                              |
| Date Submitted by the Author:   | 23-Jun-2017                                                                                                                                                                                                                                                                                                                                                                                                                                                                                           |
| Complete List of Authors:       | England, Lucinda; Centre for Disease Control, Tong, Van; Centre for Disease Control Rockhill, Kari; Centre for Disease Control Hsia, Jason; Centre for Disease Control McAfee, Tim; Centre for Disease Control Patel, Deesha; Centre for Disease Control Rupp, Katelin ; Indiana State Department of Health Conrey, Elizabeth; Centers for Disease Control and Prevention; Ohio Department of Mental Health Valdivieso, Claudia; Kentucky Department of Public Health Davis, Kevin; RTI International |
| <b>Primary Subject Heading</b>: | Public health                                                                                                                                                                                                                                                                                                                                                                                                                                                                                         |
| Secondary Subject Heading:      | Smoking and tobacco                                                                                                                                                                                                                                                                                                                                                                                                                                                                                   |
| Keywords:                       | pregnancy, smoking cessation, mass media campaign                                                                                                                                                                                                                                                                                                                                                                                                                                                     |
|                                 |                                                                                                                                                                                                                                                                                                                                                                                                                                                                                                       |

SCHOLARONE™  
Manuscripts

1  
2 **Evaluation of a federally-funded mass media campaign and smoking cessation in pregnant**  
3 **women: a population-based study in three states**  
4  
5  
6

7 Lucinda England,<sup>1\*</sup> Van T. Tong,<sup>2</sup> Karilynn Rockhill,<sup>1</sup> Jason Hsia,<sup>1</sup> Tim McAfee,<sup>1</sup> Deesha Patel,<sup>1</sup>  
8 Katelin Rupp,<sup>3</sup> Elizabeth J Conrey,<sup>2,4</sup> Claudia Valdivieso,<sup>5</sup> Kevin C. Davis<sup>6</sup>  
9  
10

11 <sup>1</sup>Office on Smoking and Health, National Center for Chronic Disease Prevention and Health Promotion,  
12 Centers for Disease Control and Prevention, Atlanta, GA, USA

13 <sup>2</sup>Division of Reproductive Health, national Center for Chronic Disease Prevention and Health  
14 Promotion, Centers for Disease Control and Prevention, Atlanta, GA, USA

15 <sup>3</sup>Indiana State Department of Health, Tobacco Prevention and Cessation Commission, IN, USA

16 <sup>4</sup>Ohio Department of Health, Columbus, OH, USA

17 <sup>5</sup>Kentucky Department for Public Health, Frankfort, KY, USA

18 <sup>6</sup>Center for Health Policy Science and Tobacco, RTI International, Research Triangle Park, NC, USA  
19  
20

21 \*Corresponding author  
22

23 [lbe9@cdc.gov](mailto:lbe9@cdc.gov) (LJE)  
24  
25

26 *The findings and conclusions of this report are those of the authors and do not necessarily represent the*  
27 *official position of the Centers for Disease Control and Prevention. This study includes data by the Ohio*  
28 *Department of Health which should not be considered as an endorsement of this study or its*  
29 *conclusions.*  
30  
31  
32  
33  
34

35 Word count: 4263  
36

37 Key words: pregnancy, smoking cessation, mass media campaign  
38  
39  
40  
41  
42  
43  
44  
45  
46  
47  
48  
49  
50  
51  
52  
53  
54  
55  
56  
57  
58  
59  
60



## Abstract

### Objectives

In 2012, the Centers for Disease Control and Prevention initiated a national anti-smoking campaign, *Tips from Former Smokers (Tips)*. As a result of the campaign, quit attempts among smokers increased in the general population by 3.7 percentage points. In the current study, we assessed the effects of *Tips* on smoking cessation in pregnant women.

### Methods

We used 2009-2013 certificates of live births in three U.S. states: Indiana, Kentucky, and Ohio. Smoking cessation by the third trimester of pregnancy was examined among women who smoked in the three months pre-pregnancy. Campaign exposure was defined as overlap between the airing of *Tips* 2012 (March 19-June 10) and the pre-pregnancy and pregnancy periods. Women who delivered before *Tips* 2012 were not exposed. Adjusted logistic regression was used to determine whether exposure to *Tips* was independently associated with smoking cessation.

### Results

Cessation rates were stable during 2009-2011, but increased at the time *Tips* 2012 aired, and remained elevated. Overall, 32.9% of unexposed and 34.7% of exposed smokers quit by the third trimester ( $p < 0.001$ ). Exposure to *Tips* 2012 was associated with increased cessation (adjusted odds ratio: 1.07, 95% Confidence Interval: 1.05-1.10).

### Conclusions

Exposure to a national anti-smoking campaign for a general audience was associated with smoking cessation in pregnant women.

**Words: 206**

### Strengths and limitations of this study

- This is the first study to examine the association between a general mass media anti-tobacco campaign (*Tips from Former Smokers*) and smoking cessation in pregnant women.
- Women with live births in 3 states were examined; trimester-specific smoking status and temporal relationship to airing of the *Tips* campaign.

1  
2  
3  
4  
5  
6  
7  
8  
9  
10  
11  
12  
13  
14  
15  
16  
17  
18  
19  
20  
21  
22  
23  
24  
25  
26  
27  
28  
29  
30  
31  
32  
33  
34  
35  
36  
37  
38  
39  
40  
41  
42  
43  
44  
45  
46  
47  
48  
49  
50  
51  
52  
53  
54  
55  
56  
57  
58  
59  
60

- Analysis was an ecological time-series; we did not have information on exposure to the *Tips* campaign at the individual level.
- Smoking status was based on self-report contained in the birth certificate.

For peer review only

## Introduction

Tobacco use is a leading cause of preventable disease and death in the United States[1] and worldwide.[2] In 2012, the U.S. Centers for Disease Control and Prevention delivered a national anti-smoking campaign called *Tips from Former Smokers (Tips 2012)*. The campaign included graphic images of the health consequences of smoking, and reached an estimated 80% of U.S. cigarette smokers.[3] An evaluation of *Tips 2012* found that quit attempts among smokers increased in the general population, from 31.1% to 34.8% as a result of the campaign.[3] Of those who made a quit attempt, 13.4% were abstinent at follow up immediately after the campaign ended. Based on relapse survival-curve analysis, it is estimated that approximately half of those with short-term abstinence achieved long-term abstinence.[3] In the second *Tips* campaign, which aired in 2013[4], the effect of media dose on quit attempt rates was evaluated. Sixty-seven of 190 media markets were randomly selected to receive a higher dose media buy (3 times the media buy of the standard dose). [5] An evaluation of *Tips 2013* found the relative quit attempt rate was significantly higher in higher-dose markets (38.8%) than in standard-dose markets (34.9%).[5]

Smoking is a leading cause of infant disease and death in the U.S. An estimated 5.3%–7.7% of preterm deliveries, 13.1%–19.0% of term low birth weight deliveries, and 23.2%–33.6% of Sudden Infant Death Syndrome (SIDS) cases are attributable to prenatal smoking.[6] Despite the known adverse effects, prenatal smoking prevalence remains unacceptably high. In a population-based analysis in the U.S. from 2009-2011, nearly one-quarter (24%) of women with a recent live birth smoked in the three months before pregnancy, and 11% smoked during the last 3 months of pregnancy.[7] Furthermore, U.S. prenatal smoking prevalence and cessation rates have not improved appreciably over time.[7, 8] Currently available clinical cessation interventions for pregnant women are only modestly effective (with pooled relative risks for cessation less than 1.5), [9,10] and by themselves are unlikely to result in large changes in prenatal smoking at the population level.[11]

1  
2 To our knowledge, no studies have assessed the impact of a general anti-smoking campaign on smoking  
3  
4 cessation in pregnant women. To address this gap, we used U.S. birth certificate data from three  
5  
6 contiguous states to evaluate cessation rates in pregnant women before (2009-2011) and during the *Tips*  
7  
8 2012 campaign. We also assessed whether exposure to the *Tips* 2012 campaign was independently  
9  
10 associated with cessation after adjusting for potential confounders.  
11  
12

## 13 14 **Methods**

### 15 16 17 **Study design and setting**

18  
19 We performed an observational study of patterns of smoking cessation in pregnant women. Because the  
20  
21 current analysis necessitated state-level data-sharing and therefore could not be readily completed using  
22  
23 national data, we used birth certificates files for resident live births from three states: Indiana, Kentucky,  
24  
25 and Ohio, from 2009-2013. These states were selected based on the overall annual number of births, the  
26  
27 relatively high prevalence of cigarette smoking during pregnancy [12,13] and their geographical  
28  
29 proximity (the three states are geographically contiguous with overlapping *Tips* media markets). In  
30  
31 addition, none had introduced new state-level tobacco control programs at the time of the airing of *Tips*  
32  
33 2012.  
34  
35  
36  
37  
38  
39

### 40 41 ***Tips* Media Campaign**

42  
43 *Tips* 2012 aired for 12 weeks, from March 19 through June 10, 2012, with sufficient media placement to  
44  
45 reach three-quarters of US adults on multiple occasions.[3] Advertisements appeared on television in all  
46  
47 U.S. media markets through a national buy of commercial advertising time on cable television networks.

48  
49 *Tips* 2012 had a ubiquitous national buy and a local “buy up” strategy in which the campaign was  
50  
51 broadcast through smaller local television channels in media markets with high cigarette smoking  
52  
53 prevalence. All three states included in our analysis had multiple markets that received the additional  
54  
55 local television ad buys. The total campaign dose was approximately 70% higher than the national  
56  
57  
58  
59  
60

1 average dose in Ohio and Kentucky, and approximately 25% higher in Indiana. It is estimated that 80%  
2 of U.S. cigarette smokers saw at least one *Tips* 2012 message, and that those who saw any advertisement  
3 averaged 23 views over the 12-week period.[3]  
4  
5  
6  
7

### 8 9 10 **Campaign exposure**

11 Exposure to the *Tips* campaign was defined as temporal overlap between each woman's pregnancy and  
12 the preceding three months (pre-pregnancy), and airing of *Tips* 2012. A woman's date of conception and  
13 the beginning dates for each trimester were calculated from the obstetric estimate of the gestational age  
14 at delivery in completed weeks and from the infant's date of birth, which was ascertained directly from  
15 the birth certificate. The 3-month period preceding her date of conception was then calculated. The date  
16 3 months before conception and the date of delivery were compared with the dates of the *Tips* campaign  
17 to determine temporal overlap. Women were categorized as "not exposed" to the campaign if they  
18 delivered before the first day of the *Tips* 2012 campaign, and women were categorized as "exposed" to  
19 the campaign if any day from the first date of the 3 months before conception through the end of the  
20 second trimester overlapped with the airing of the *Tips* 2012 campaign. We included the 3 months  
21 before conception in our exposure window because it aligned with the period of baseline smoking status  
22 included in the birth certificate and because we felt it was reasonable to assume that women who viewed  
23 the campaign in that time period would still remember the material after becoming pregnant. We did not  
24 examine exposure that occurred only in the third trimester because the cessation status of women who  
25 quit in response to seeing the campaign very late in pregnancy might not have been captured in the birth  
26 certificate, which only notes whether a woman smoked in the third trimester or not.  
27  
28  
29  
30  
31  
32  
33  
34  
35  
36  
37  
38  
39  
40  
41  
42  
43  
44  
45  
46  
47  
48  
49

50 Intensity of exposure to the *Tips* campaign was assessed using weekly media market-level *Tips* gross  
51 rating points (GRPs) for national and local television advertising as a continuous variable. GRPs are a  
52 standard measure of advertising "dose" delivered to a given audience in a given media market and time  
53 period, and are defined as the product of the percentage of the audience that is exposed (i.e., audience  
54  
55  
56  
57  
58  
59  
60

1 reach) and the frequency with which that exposure occurs (i.e., the number of times ads are aired). GRPs  
2 are calculated at the market level by Nielsen Media Research based on TV ratings for shows on which  
3  
4  
5  
6  
7  
8  
9  
10  
11  
12  
13  
14  
15  
16  
17  
18  
19  
20  
21  
22  
23  
24  
25  
26  
27  
28  
29  
30  
31  
32  
33  
34  
35  
36  
37  
38  
39  
40  
41  
42  
43  
44  
45  
46  
47  
48  
49  
50  
51  
52  
53  
54  
55  
56  
57  
58  
59  
60

reach) and the frequency with which that exposure occurs (i.e., the number of times ads are aired). GRPs are calculated at the market level by Nielsen Media Research based on TV ratings for shows on which *Tips* ads aired. For example, if an ad was viewed by 20% of the TV viewing audience across all shows that aired the ads during a given week, and if the ad was aired 5 times during that week, this would yield a GRP of 100 (20 x 5) for that week. We used women's cumulative *Tips* television GRPs in each designated market area (DMA).[14] Cumulative GRPs were computed by summing the weekly GRPs in each DMA based on maternal county of residence at the time of delivery for the weeks during which the woman was exposed to the *Tips* campaign.

### Smoking Cessation

The main outcome was smoking cessation by the third trimester of pregnancy among women who smoked in the three months before pregnancy, as recorded on the 2003 revision of the U.S. standard certificate of live birth.[15] On the birth certificate, cigarette smoking status is determined from four questions about the average number of cigarettes smoked per day in the three months before pregnancy and during each trimester of pregnancy. Our study population of pre-pregnancy smokers were women who reported smoking > 0 cigarettes per day in the three months before pregnancy. Cessation was defined as occurring in pre-pregnancy smokers who reported smoking 0 cigarettes per day in the third trimester.

### Covariates

Co-variates were ascertained from the birth certificate and included following continuous and categorical variables: maternal age; race/ethnicity (non-Hispanic white, non-Hispanic African American, Hispanic, or other); education (less than high school, GED or high school diploma, some college or college graduate); marital status (married, unmarried); parity, Special Supplemental Nutrition Program for Woman, Infants and Children (WIC) enrollment (yes/no); pre-pregnancy body mass index (BMI); health insurance status (Medicaid, private insurance, self-pay/uninsured, or other [Indian Health Service,

1  
2 CHAMPUS/TRICARE, etc.]); state of maternal residence; and number of cigarettes smoked per day in  
3  
4 the three months before pregnancy.  
5  
6

## 7 **Analysis**

### 8 Trends in Cessation with Respect to Airing of the *Tips* Campaign

9  
10 All women who delivered in the study period and who smoked in the three months before pregnancy  
11  
12 were included in the trend analysis. Crude and standardized cessation rates were calculated and plotted  
13  
14 by delivery date in 3 month intervals for 2009 through 2013. Data were examined for the 3 states  
15  
16 individually and combined. We used joinpoint regression to identify the line segments with the best fit  
17  
18 across the study period for the combined data.[16] Cessation rates were standardized for four variables  
19  
20 that are established in the literature as being associated with cessation (some categories were collapsed  
21  
22 to assure adequate sample size in each stratum): maternal age (< 18, 18-34, and  $\geq$  35 years of age),  
23  
24 race/ethnicity (non-Hispanic white and other), education (< high school, high school, > high school),  
25  
26 and parity (first or higher order birth).[8, 17-19] Standardization was repeated using the number of  
27  
28 cigarettes smoked per day before pregnancy (< 10 and  $\geq$ 10) in place of race/ethnicity. Standardization  
29  
30 was limited to four variables because of sample size constraints. Direct methods were used and were  
31  
32 based on the 2009 first quarter population for each state for state-specific analyses, and for the combined  
33  
34 2009 first quarter population for the combined analysis. Generalized linear models were used to generate  
35  
36 a linear baseline trend for the pre-campaign period (from January 1, 2009 through March 18, 2012).  
37  
38 Because only 9 months separated the airing of the *Tips* 2012 and 2013 campaigns, the exposure period  
39  
40 for most women who delivered after March 18, 2012 (the first day of the *Tips* 2012 campaign)  
41  
42 overlapped with *Tips* 2012 or *Tips* 2012 and 2013. Thus, few women who delivered after March 18,  
43  
44 2012 were unexposed to the *Tips* campaign.  
45  
46  
47  
48  
49  
50  
51  
52  
53  
54

### 55 Association between *Tips* Campaign Exposure and Smoking Cessation

1 Smoking cessation in women categorized as exposed or not exposed to the *Tips* 2012 campaign were  
2 examined using standardized rates and regression analysis in a subgroup of the study population from  
3 the trend analysis. The study population was restricted for this analysis in the following ways: women  
4 who were only exposed to *Tips* 2012 during the third trimester of pregnancy were excluded because of  
5 the proximity of exposure to delivery, and women who became pregnant more than 3-months after *Tips*  
6 2012 aired (post-campaign) were excluded because they were considered *not* exposed to *Tips* 2012.  
7  
8

9 During our analysis, we noted that some women in our study who were exposed to *Tips* 2012 were also  
10 exposed to *Tips* 2013, which aired from March 4 through June 21, 2013, and featured content similar to  
11 *Tips* 2012 (neither campaign targeted pregnant women nor featured pregnancy-related health  
12 outcomes).[3, 5] To address this, we created a separate set of mutually exclusive exposure variables for  
13 a secondary analysis—not exposed to *Tips*, exposed to *Tips* 2012 only, and exposed to *Tips* 2012 and  
14 *Tips* 2013. We did not conduct an analysis of women who were only exposed to *Tips* 2013 (women who  
15 were previously excluded because they became pregnant more than 3 months after *Tips* 2012 aired),  
16 because we did not have data for the full cohort of women, many of whom delivered in 2014.  
17  
18

19 We compared demographic characteristics and cessation rates in unexposed and exposed women using  
20 descriptive statistics. Cessation rates in exposed and unexposed women were compared using chi-square  
21 tests. Standardized cessation rates were calculated using the methods previously described to standardize  
22 for maternal age, race/ethnicity, education, parity, and cigarettes/day.  
23  
24

25 Logistic regression was used to generate crude and adjusted odds ratios (ORs) and 95% confidence  
26 intervals (CIs) for cessation in women exposed to the *Tips* campaign. In the unadjusted analysis, the  
27 results were stratified by maternal demographic characteristics. In multivariate regression models,  
28 results were adjusted for maternal age (continuous), race/ethnicity (non-Hispanic white, non-Hispanic  
29 African American, Hispanic, or other), education (less than high school, GED or high school diploma,  
30  
31  
32  
33  
34  
35  
36  
37  
38  
39  
40  
41  
42  
43  
44  
45  
46  
47  
48  
49  
50  
51  
52  
53  
54  
55  
56  
57  
58  
59  
60



1  
2 some college or college graduate), marital status, parity (first or higher order birth), WIC enrollment,  
3  
4 pre-pregnancy BMI (underweight or  $<18.5 \text{ kg/m}^2$ , normal weight or  $18.5\text{-}24.9 \text{ kg/m}^2$ , overweight or  $25\text{-}$   
5  
6  $29.9 \text{ kg/m}^2$ , and obese or  $> 30 \text{ kg/m}^2$ );[20] insurance status (Medicaid, private insurance, self-  
7  
8 pay/uninsured, or other), state of residence, and the number of cigarettes smoked per day in the 3 months  
9  
10 before pregnancy (1-10, 11-20,  $<20$ ). Observations with missing co-variate values were excluded from  
11  
12 logistic regression, but represented less than 5% of the total. Separate models were constructed with  
13  
14 exposure as a dichotomous variable (unexposed and exposed to *Tips* 2012), a 3-level variable  
15  
16 (unexposed, exposed only to *Tips* 2012, and exposed to *Tips* 2012 and 2013), and as a continuous  
17  
18 variable based on cumulative GRPs for *Tips* 2012 and 2013 combined. We then calculated ORs and  
19  
20 95% CIs for every 600 GRP increase, which corresponds to approximately 6 weeks of exposure at the  
21  
22 national level (the average cumulative exposure for the three-state area was 1857 GRPs).  
23  
24  
25  
26  
27  
28

### 29 Potential Changes in Misclassification of Smoking Status

30  
31 Pregnant women who smoke have high rates of nondisclosure.[21,22] Because we were concerned that  
32  
33 the airing of the *Tips* campaign could have increased nondisclosure among smokers (if smokers felt  
34  
35 more stigmatized after the campaign began airing), we sought to determine whether an increase in the  
36  
37 misclassification of continuing smokers as self-reported quitters could have occurred. Infant birth weight  
38  
39 is highly sensitive to tobacco smoke exposure,[23] and we assumed that an increase in misclassification  
40  
41 of active smokers as quitters would result in a lower mean birth weight among quitters in the *Tips*  
42  
43 exposed vs. the unexposed group. To assess this possibility, we compared mean birth weight among  
44  
45 quitters (obtained from birth certificates) with singleton deliveries using analysis of covariance. Mean  
46  
47 birth weight was adjusted for maternal age, race, education, marital status, parity, WIC enrollment, pre-  
48  
49 pregnancy BMI, insurance status, state of residence, and gestational age at delivery.  
50  
51  
52  
53  
54

55  
56 In all analyses, tests were two-sided, and  $\alpha$ -values of 0.05 were considered statistically significant.

57  
58 Statistical analyses were performed using SAS software, version 9.3 (SAS Institute Inc., Cary, NC,  
59  
60

1 USA) for Windows. This study was reviewed and approved as research by the Institutional Review  
2  
3  
4 Boards of each state. This study was determined to be exempt from review as research without human  
5  
6  
7 subjects by the Institutional Review Board at the Centers for Disease Control and Prevention.  
8  
9

## 10 **Results**

### 11 **Sample Characteristics**

12  
13  
14  
15 During the study period, there were 1,401,561 live births, of which 10,218 (0.7%) were excluded  
16  
17 because the 2003 revised birth certificate was not used or because smoking status or gestational age was  
18  
19 missing (Figure 1). Of the 1,391,343 remaining, there were 894,258 births to women who were  
20  
21 unexposed because they delivered before the *Tips* 2012 campaign; 209,053 births (23.4%) in this group  
22  
23 were to women who smoked in the three months before pregnancy. There were 329,706 births to women  
24  
25 whose pregnancies overlapped with the *Tips* 2012 (exposed); 73,582 (22.3%) of these smoked in the  
26  
27 three months before pregnancy. Of these, 12,835 (17.4%) were exposed to *Tips* 2012 in the third  
28  
29 trimester only, and so were excluded from further analysis. Thus, there were 60,747 births for inclusion  
30  
31 in the analysis of the association between *Tips* campaign exposure and smoking cessation. Of these,  
32  
33 13,610 (22.4%) were also exposed to *Tips* 2013.  
34  
35  
36  
37  
38  
39

### 40 **Trends in Cessation with Respect to Airing of the *Tips* Campaign**

41  
42 During the pre-campaign period (from January 2009 through March 18, 2012) cessation rates among  
43  
44 smokers who delivered before *Tips* 2012 aired remained flat. (Figure 2). Cessation rates then increased  
45  
46 between the 12<sup>th</sup> and the 15<sup>th</sup> quarter, coinciding with the airing of *Tips* 2012 and reached a plateau by  
47  
48 the end of *Tips* 2012. The plateau was sustained through the end of 2013. Analysis using joinpoint  
49  
50 regression verified the number of statistically significant joinpoints at the  $p = 0.05$  level.  
51  
52  
53  
54  
55  
56  
57  
58  
59  
60

1  
2 When states were examined individually, trends in Ohio and Indiana resembled those using the  
3 aggregated data, but an increase in cessation that began approximately 1 quarter before *Tips* 2012 was  
4 observed in Kentucky (data not shown).  
5  
6  
7

### 8 9 **Association between *Tips* Campaign Exposure and Smoking Cessation**

10 Demographic characteristics of women exposed and unexposed to the *Tips* campaign differed slightly  
11 for all variables examined; these differences were statistically significant (Table 1). Overall, 33.0% of  
12 unexposed smokers quit by the third trimester. In contrast, 34.8% of exposed smokers quit by the third  
13 trimester, an absolute increase of 1.8 percentage points ( $p < 0.001$ ) (Table 2). Standardized cessation  
14 rates were 32.8% in unexposed women and 34.3% in exposed women, an absolute increase of 1.5  
15 percentage points ( $p < 0.001$ ). Including cigarettes/day in standardization calculations did not change  
16 these findings (data not shown). For individual states, there was a 0.9 percentage point increase in  
17 exposed vs. unexposed women for Indiana, a 1.0 percentage point increase for Ohio, and a 3.4  
18 percentage point increase for Kentucky. Cessation rates were statistically significantly higher in exposed  
19 vs. unexposed women for nearly all subpopulations examined. Statistically significant increases in  
20 cessation rates were observed in all age groups, in all race/ethnicity groups except Hispanic women, in  
21 all education categories, in married and unmarried women, in first and higher order parity groups, in all  
22 BMI groups, in those enrolled in WIC and not enrolled, and in all insurance categories except self-pay.  
23 Statistically significant increases were also seen in women smoking 1-10 cigarettes/day before  
24 pregnancy and in those smoking  $\geq 21$  cigarettes/day, but not in those smoking 11-20 cigarettes/day (data  
25 not shown).  
26  
27  
28  
29  
30  
31  
32  
33  
34  
35  
36  
37  
38  
39  
40  
41  
42  
43  
44  
45  
46  
47  
48

49 In unadjusted regression models, cessation in smokers was statistically significantly associated with *Tips*  
50 2012 campaign exposure (OR 1.08, 95% CI 1.06-1.10) (Table 3). After adjustment for potential  
51 confounders, results remained statistically significant (AOR 1.07, 95% CI 1.05-1.10). Because the  
52 increase in cessation was substantially higher in Kentucky than the other two states, the analysis was  
53  
54  
55  
56  
57  
58  
59  
60

1 repeated after excluding Kentucky. Results were attenuated, but remained statistically significant (AOR  
2 1.03, 95% CI 1.01-1.06). Including exposure to *Tips* 2013 in the model did not increase the odds of  
3 quitting (*Tips* 2012 only: AOR 1.07 (95% CI 1.04-1.09); *Tips* 2012 and 2013, AOR =1.06, 95% CI 1.01-  
4 1.10).  
5  
6  
7  
8  
9

10 On average, exposed women in our analysis were exposed to 176.6 GRPs per week. When *Tips* 2012  
11 and 2013 exposure dose was examined as a continuous variable, the adjusted odds of quitting rose for  
12 each increase of 600 GRPs and this finding was statistically significant (AOR= 1.07, 95% CI 1.03-1.11).  
13  
14  
15  
16  
17  
18  
19

### 20 **Potential Changes in Misclassification of Smoking Status**

21 The mean crude and adjusted birthweights of infants born to women who quit smoking and were not  
22 exposed to the campaign were not statistically significantly different from those of infants born to  
23 women who quit smoking and were exposed to the campaign (crude mean birthweight difference -5.2 g,  
24 95% CI -14.1, 3.8; adjusted mean birthweight difference -2.0 g, 95% CI -9.0, 5.0) (Table 4). These  
25 findings did not change when we restricted our analysis to term births (data not shown). Thus, we found  
26 no evidence of a substantial change in the proportion of smokers misclassified as quitters after the *Tips*  
27 campaigns aired.  
28  
29  
30  
31  
32  
33  
34  
35  
36  
37  
38  
39

### 40 **Discussion**

41 The *Tips* 2012 campaign was the first federally-funded mass-media anti-smoking campaign to air in the  
42 U.S. It reached the majority of U.S. cigarette smokers and resulted in a 3.7 percentage point absolute  
43 increase in quit attempts in a general population of smokers.[3] The campaign was also highly cost-  
44 effective, spending approximately \$480 per quitter and \$393 per life year saved.[24] Although the  
45 campaign did not include pregnancy-specific messages, we found that *Tips* 2012 was associated with  
46 increased cessation in pregnant women. Furthermore, we observed cessation benefits across most  
47 subgroups, including adolescents under 18 years of age, Medicaid-insured women, and women with less  
48  
49  
50  
51  
52  
53  
54  
55  
56  
57  
58  
59  
60

1  
2 than a high school education, and that media buy dose was positively associated with cessation rates.  
3  
4 National ad campaigns have the potential to improve public health not because they have large effects  
5  
6 on quit rates, but because they reach so many smokers. The Tips 2014 campaign increased the  
7  
8 percentage of smokers who quit by a modest 0.25 percentage points overall, but resulted in 104,000  
9  
10 additional quitters nationally.[25] In our analysis, the percentage of smokers who had quit by the third  
11  
12 trimester increased by 1.8 percentage points, which compares favorably to national estimates for Tips  
13  
14 and has the potential to substantially reduce adverse tobacco-related pregnancy outcomes.  
15  
16  
17

18  
19 There are few studies in the U.S. or elsewhere which have formally evaluated the effects of anti-tobacco  
20  
21 campaigns in pregnant women. In 2001, the America Legacy Foundation launched a national campaign  
22  
23 targeting pregnant women called “Great Start,” which included television, radio, print, and website  
24  
25 components and established a quitline for pregnant women.[26] The campaign reached 26 million  
26  
27 television viewers and generated over 11,000 calls to the quit line.[26] However, the number of women  
28  
29 who quit smoking as a result of the campaign was not reported. A smaller social marketing campaign  
30  
31 targeting African American women called “One Tiny Reason to Quit,” promoted the use of quitlines to  
32  
33 pregnant women in Richmond, Virginia.[27] Post-campaign quitline calls from pregnant women  
34  
35 increased significantly compared with pre-campaign calls, but again, effects on cessation rates were not  
36  
37 assessed.[27] A mass media campaign conducted in 1994 throughout England targeting pregnant women  
38  
39 resulted in a 14% increase in calls to quitlines from pregnant women, but no significant changes in  
40  
41 prenatal smoking prevalence were documented.[28] Findings from the current study indicate that a  
42  
43 graphic anti-smoking campaigns developed for a general audience could also increase cessation rates  
44  
45 among pregnant women.  
46  
47  
48  
49  
50  
51

52  
53 Our study has several strengths, including its novel topic and its large, population-based sample. Our  
54  
55 study also has some limitations. First, our analysis was an ecological time series; we do not have data on  
56  
57 exposure to the campaign at the individual level. However, previous studies have estimated that *Tips*  
58  
59  
60

1 reached about 80% of cigarette smokers [3] and it is likely that our population of pregnant women had  
2 high exposure levels as well. Inferences about potential causal effects of the campaign assume no other  
3 tobacco control efforts were implemented at or near the time the *Tips* 2012 campaign aired, and the  
4 possibility exists that an unrecognized factor might have affected cessation rates. The increase in  
5 cessation in Kentucky that slightly preceded the airing of *Tips* 2012 could have been the result of such  
6 an unrecognized factor. However, our research revealed no evidence of other large-scale media  
7 campaigns, interventions, or policy changes leading up to or during the *Tips* campaign in these three  
8 states.[3] The magnitude of the change in cessation rates, which took place following a period during  
9 which quarterly cessation rates had been flat for at least 3 years, provides additional support for a  
10 potential causal relationship. The increase in cessation rates was sustained through the end of 2013.  
11 Because *Tips* campaigns have aired each year since 2012, we currently do not have a post-campaign,  
12 unexposed population in which to determine whether cessation rates would return to pre-campaign  
13 levels. Other limitations include that quit status was not biochemically validated, which would be  
14 problematic if non-disclosure increased after the introduction of the *Tips* campaign. However, we  
15 examined mean birth weight among infants of quitters by *Tips* exposure status and did not find evidence  
16 of increased misclassification. Our results apply to pregnancies ending in a live birth in three states and  
17 can't be generalized to the U.S. population or to pregnancies ending in miscarriage or stillbirth. The fact  
18 that cessation rates in Kentucky increased disproportionately after *Tips* 2012 was aired compared with  
19 Ohio and Indiana supports that effects of the campaign may vary by state. Kentucky had the highest  
20 smoking prevalence and the lowest quit rate during the baseline period, which could have contributed to  
21 its dramatic improvement in quit rates. Additional research is needed to address the effects of the *Tips*  
22 campaign on smoking cessation in pregnant women in other states and regions of the U.S; the effects of  
23 the *Tips* campaign could be more modest in states with lower smoking prevalence. Finally, unlike the  
24 *Tips* 2013 campaign in which media markets were randomized to receive a higher or lower media buy,

1  
2 the national media buy for *Tips* 2012 was supplemented with broadcasts in smaller local television  
3  
4 channels in media markets with high smoking prevalence.[3] Thus, our finding that cessation was  
5  
6 positively associated with media buy dose could be the result of confounding.  
7  
8

9  
10 It is unknown whether the 2012 *Tips* campaign was as effective among pregnant smokers as a campaign  
11  
12 specifically targeting pregnant women would have been. Some qualitative studies,[26, 29] but not  
13  
14 all,[30] have found that pregnant women prefer positive and empowering smoking cessation ads.  
15  
16 However, it has not been established which types of ads actually increase cessation behavior and how  
17  
18 they compare with one another. It is inefficient to mount a mass media campaign focused solely on  
19  
20 pregnant women since pregnancy is temporary and incidence is spread out across the entire population  
21  
22 of women of child-bearing age at a low frequency. A general campaign that affects cessation rates in  
23  
24 both general and pregnant populations could be more cost effective than a campaign only targeting  
25  
26 pregnant women, and additional research is needed to compare these two approaches. In addition, more  
27  
28 research is warranted to determine the optimal frequency and duration of a general campaign, as well as  
29  
30 the demographic and geographic subpopulations of pregnant women who are most likely to benefit.  
31  
32 Similar campaigns in other countries might also benefit pregnant women, and inclusion of pregnant  
33  
34 women in future evaluations of such programs should be considered.  
35  
36  
37  
38  
39

40  
41 In conclusion, a general, national anti-smoking media campaign was associated with increased smoking  
42  
43 cessation in a pregnant population. Future research comparing effectiveness of campaigns designed to  
44  
45 target pregnant women with those targeting the general population could help inform the future  
46  
47 development, implementation, and sustainment of anti-smoking campaigns to benefit pregnant women.  
48  
49  
50  
51  
52  
53  
54  
55  
56  
57  
58  
59  
60

1  
2 **Contributors:** All authors fulfill the authorship criteria recommended by the ICMJE. LJE conceived of  
3 the study, contributed to the analysis and interpretation of data, and drafted the paper. VTT co-designed  
4 the methods, and contributed to the analysis and interpretation of data. KR co-designed the methods, and  
5 conducted the analysis and contributed to the analysis and interpretation of data. JS co-designed the  
6 methods, provided statistical oversight, and contributed to the interpretation of data. TM contributed to  
7 the analysis and interpretation of data. DP contributed to the analysis and interpretation of data. KR  
8 contributed to the acquisition of data, analysis and interpretation of data. EJC contributed to the  
9 acquisition of data, analysis and interpretation of data. CV contributed to the acquisition of data, analysis  
10 and interpretation of data. KD contributed to the acquisition of data, analysis and interpretation of data,  
11 and provided statistical oversight. Each author contributed to drafting the manuscript or to critical  
12 revisions for intellectual content; and each approved the final version for publication. Each author takes  
13 final responsibility for the paper.  
14  
15  
16  
17  
18

19 **Funding:** This research received no specific grant from any funding agency. Data collection and  
20 analysis was supported by the Centers for Disease Control and Prevention. Seven of the authors of the  
21 manuscript were employed by the Centers for Disease Control and Prevention at the time the study was  
22 conducted.  
23  
24

25 **Competing interests:** None declared.  
26

#### 27 **Data sharing statement:**

28  
29 Data described as “not shown” is available from the author upon request. Please Contact Lucinda  
30 England, Centers for Disease Control and Prevention, lbe9@cdc.gov  
31  
32

33 GRP data are available upon request through the Centers for Disease Control and Prevention. Please  
34 contact Rebecca Murphy, Centers for Disease Control and Prevention [Rebecca.Murphy@cdc.hhs.gov](mailto:Rebecca.Murphy@cdc.hhs.gov)  
35  
36

37 State-level birth certificate data are available to researchers whose research proposals meet criteria set  
38 by each of the individual states. Please contact the Indiana State Department of Health  
39 ([KaRupp@isdh.in.gov](mailto:KaRupp@isdh.in.gov)) to request the release of Indiana birth certificate data. Please access the website:  
40 <http://chfs.ky.gov/os/omb/irb/> for information on how to request Kentucky birth certificate data. Please  
41 access the website: <http://www.odh.ohio.gov/en/healthstats/irb/irb.aspx> for information on how to  
42 request Ohio birth certificate data.  
43  
44  
45  
46  
47  
48  
49  
50  
51  
52  
53  
54  
55  
56  
57  
58  
59  
60



## References

- 1 [1] U.S. Department of Health and Human Services. The Health Consequences of Smoking--50  
2 Years of Progress: A Report of the Surgeon General. Atlanta, GA: U.S. Department of Health and  
3 Human Services, Centers for Disease Control and Prevention, National Center for Chronic  
4 Disease Prevention and Health Promotion, Office on Smoking and Health 2014.
- 5 [2] World Health Organization. WHO Global Report: Mortality Attributable to Tobacco. 2012.  
6 [http://apps.who.int/iris/bitstream/10665/44815/1/9789241564434\\_eng.pdf](http://apps.who.int/iris/bitstream/10665/44815/1/9789241564434_eng.pdf) (Accessed 28 Feb  
7 2017)
- 8 [3] McAfee T, Davis KC, Alexander RL, et al. Effect of the first federally funded US antismoking  
9 national media campaign. *Lancet* 2013;382(9909):2003-2011.
- 10 [4] Centers for Disease Control and Prevention. Impact of a national tobacco education campaign on  
11 weekly numbers of quitline calls and website visitors--United States, March 4-June 23, 2013.  
12 *Morb Mortal Wkly Rep* 2013;62(37):763-767.
- 13 [5] McAfee T, Davis KC, Shafer P, et al. Increasing the dose of television advertising in a national  
14 antismoking media campaign: results from a randomised field trial. *Tob Control* 2017;26:19-28.
- 15 [6] Dietz PM, England LJ, Shapiro-Mendoza CK, Tong VT, Farr SL, Callaghan WM. Infant  
16 morbidity and mortality attributable to prenatal smoking in the U.S. *Am J Prev Med*  
17 2010;39(1):45-52.
- 18 [7] Rockhill KM, Tong VT, Farr SL, et al. Postpartum Smoking Relapse After Quitting During  
19 Pregnancy: Pregnancy Risk Assessment Monitoring System, 2000-2011. *J Women's Health*  
20 (2002) 2015.
- 21 [8] Tong VT, Dietz PM, Morrow B, et al. Trends in smoking before, during, and after pregnancy--  
22 Pregnancy Risk Assessment Monitoring System, United States, 40 sites, 2000-2010. *Morb*  
23 *Mortal Wkly Rep Surveill Sum (Washington, DC: 2002)* 2013;62(6):1-19.
- 24 [9] Coleman T, Chamberlain C, Davey MA, et al. Pharmacological interventions for promoting  
25 smoking cessation during pregnancy. *Cochrane Database Syst Rev* 2015(12):Cd010078.
- 26 [10] Chamberlain C, O'Mara-Eves A, Porter J, et al. Psychosocial interventions for supporting women  
27 to stop smoking in pregnancy. *Cochrane Database Syst Rev* 2017;2: Cd001055.
- 28 [11] Kim SY, England LJ, Kendrick JS, et al. The contribution of clinic-based interventions to reduce  
29 prenatal smoking prevalence among US women. *Am J Public Health* 2009;99(5):893-898.
- 30 [12] Curtin SC, Mathews TJ. Smoking prevalence and cessation before and during pregnancy: Data  
31 from the birth certificate, 2014. National Center for Health Statistics. Hyattsville, MD 2016.
- 32 [13] Hamilton BE, Martin JA, Osterman MJK, et al. Births: Final data for 2014. National Vital  
33 Statistics Reports; vol 64 no 12. Hyattsville, MD: National Center for Health Statistics 2015.
- 34 [14] Shafer PR, Davis KC, Patel D, et al. Association Between Media Dose, Ad Tagging, and  
35 Changes in Web Traffic for a National Tobacco Education Campaign: A Market-Level  
36 Longitudinal Study. *J Med Internet Res* 2016;18(2):e39.
- 37 [15] Centers for Disease Control and Prevention. Guide to Completing the Facility Worksheets for the  
38 Certificate of Live Birth and Report of Fetal Death. 2003.  
39 <http://www.cdc.gov/nchs/data/dvs/guidetocompletefacilitywks.pdf> (Accessed 12 Nov 2016)
- 40 [16] Kim HJ, Fay MP, Feuer EJ, et al. Permutation tests for joinpoint regression with applications to  
41 cancer rates. *Stat Med* 2000;19(3):335-351.
- 42 [17] Kandel DB, Griesler PC, Schaffran C. Educational attainment and smoking among women: risk  
43 factors and consequences for offspring. *Drug and alcohol dependence* 2009;104 Suppl 1:S24-33.
- 44 [18] Graham H, Hawkins SS, Law C. Lifecourse influences on women's smoking before, during and  
45 after pregnancy. *Soc Sci Med* 2010;70(4):582-587.
- 46 [19] Lu Y, Tong S, Oldenburg B. Determinants of smoking and cessation during and after pregnancy.  
47 *Health Promot Int* 2001;16(4):355-365.

- 1  
2 [20] World Health Organization. Obesity: Preventing and Managing the Global Epidemic. Report of a  
3 WHO Consultation. 2000. Report no.: 894. Available at:  
4 [http://www.who.int/nutrition/publications/obesity/WHO\\_TRS\\_894/en/](http://www.who.int/nutrition/publications/obesity/WHO_TRS_894/en/). (Accessed 26 Mar 2017)  
5 [21] Dietz PM, Homa D, England LJ, et al. Estimates of nondisclosure of cigarette smoking among  
6 pregnant and nonpregnant women of reproductive age in the United States. *Am J Epidemiol*  
7 2011;173(3):355-359.  
8 [22] England LJ, Grauman A, Qian C, et al. Misclassification of maternal smoking status and its  
9 effects on an epidemiologic study of pregnancy outcomes. *Nicotine Tob Res* 2007;9(10):1005-  
10 1013.  
11 [23] England LJ, Kendrick JS, Gargiullo PM, et al. Measures of maternal tobacco exposure and infant  
12 birth weight at term. *Am J Epidemiol* 2001;153(10):954-960.  
13 [24] Xu X, Alexander RL Jr, Simpson SA, Goates S, Nonnemaker JM, Davis KC, McAfee T.  
14 A cost-effectiveness analysis of the first federally funded antismoking campaign. *Am J Prev*  
15 *Med.* 2015 Mar;48(3):318-25.  
16 [25] Neff LJ, Patel D, Davis K, et al. Evaluation of the national Tips from Former Smokers campaign:  
17 the 2014 longitudinal cohort. *Prev Chronic Dis* 2016;13:E42.  
18 [26] Haviland L, Thornton AH, Carothers S, et al. Giving infants a great start: launching a national  
19 smoking cessation program for pregnant women. *Nicotine Tob Res* 2004;6 Suppl 2:S181-188.  
20 [27] Kennedy MG, Genderson MW, Sepulveda AL, et al. Increasing tobacco quitline calls from  
21 pregnant African American women: the "One tiny reason to quit" social marketing campaign. *J*  
22 *Women's Health* (2002) 2013;22(5):432-438.  
23 [28] Champion P, Owen L, McNeill A, et al. Evaluation of a mass media campaign on smoking and  
24 pregnancy. *Addiction.* 1994;89(10):1245-54.  
25 [29] Schar EH, Gutierrez KK. Smoking cessation media campaigns from around the world:  
26 Recommendations from lessons learned. Copenhagen, Denmark: World Health Organization  
27 Regional Office for Europe; 2001.  
28 [30] Hoek J, Gifford H, Maubach N, et al. A qualitative analysis of messages to promote smoking  
29 cessation among pregnant women. *BMJ Open* 2014;4(11):e006716.  
30  
31  
32  
33  
34  
35  
36  
37  
38  
39  
40  
41  
42  
43  
44  
45  
46  
47  
48  
49  
50  
51  
52  
53  
54  
55  
56  
57  
58  
59  
60

1  
2 **Figure 1. Flow chart for study inclusion, Indiana, Kentucky, Ohio, 2009-2013**

3  
4 [Insert Figure 1]

5  
6 **Figure 2. Trends in smoking cessation<sup>a</sup> rates (observed and projected<sup>b</sup>) among women who smoked in the 3**  
7 **months before pregnancy (crude) and airing of the Tips campaigns,<sup>c</sup> Indiana, Kentucky, Ohio, 2009-2013.**

8  
9 [Insert Figure 2]

10  
11  
12  
13  
14  
15  
16  
17  
18  
19  
20  
21  
22  
23  
24  
25  
26  
27  
28  
29  
30  
31  
32  
33  
34  
35  
36  
37  
38  
39  
40  
41  
42  
43  
44  
45  
46  
47  
48  
49  
50  
51  
52  
53  
54  
55  
56  
57  
58  
59  
60

For peer review only

**Table 1. Characteristics of women who smoked in the 3 months before pregnancy, by exposure to *Tips* 2012. Indiana, Kentucky, Ohio, 2009-2013.**

|                                       | Unexposed <sup>b</sup> | Exposed <sup>c</sup> | P-value <sup>d</sup> |
|---------------------------------------|------------------------|----------------------|----------------------|
| Maternal characteristics <sup>a</sup> | (n= 209,053)           | (n= 60,747)          |                      |
| <b>Mean maternal age (yrs)</b>        | 25.2 (±5.3)            | 25.6 (±5.3)          | <.0001               |
| <b>Maternal race/ethnicity</b>        |                        |                      |                      |
| White, non-Hispanic                   | 86.5                   | 86.1                 | <.0001               |
| Black, non-Hispanic                   | 10.3                   | 10.3                 |                      |
| Hispanic                              | 2.3                    | 2.4                  |                      |
| Other                                 | 0.9                    | 1.2                  |                      |
| <b>Maternal education</b>             |                        |                      |                      |
| < High school                         | 27.0                   | 24.3                 | <.0001               |
| High school or GED                    | 38.0                   | 37.9                 |                      |
| College or graduate                   | 35.0                   | 37.8                 |                      |
| <b>Marital status</b>                 |                        |                      |                      |
| Married                               | 33.1                   | 31.7                 | <.0001               |
| Unmarried                             | 66.9                   | 68.3                 |                      |
| <b>Parity</b>                         |                        |                      |                      |
| First birth                           | 38.5                   | 37.2                 | <.0001               |
| Second or later birth                 | 61.5                   | 62.8                 |                      |
| Missing <sup>d</sup>                  |                        |                      |                      |
| <b>WIC enrollment</b>                 |                        |                      |                      |
| No                                    | 32.7                   | 33.6                 | <.0001               |
| Yes                                   | 67.3                   | 66.4                 |                      |
| <b>Pre-pregnancy BMI</b>              |                        |                      |                      |
| Underweight (<18.5)                   | 6.9                    | 6.6                  | <.0001               |
| Normal Weight (18.5-24.9)             | 44.6                   | 43.6                 |                      |
| Overweight (25-29.9)                  | 23.1                   | 23.4                 |                      |

|    |                                 |      |      |        |
|----|---------------------------------|------|------|--------|
| 1  |                                 |      |      |        |
| 2  | Obese ( $\geq 30$ )             | 25.4 | 26.4 |        |
| 3  |                                 |      |      |        |
| 4  | <b>Insurance status</b>         |      |      |        |
| 5  |                                 |      |      |        |
| 6  | Medicaid                        | 67.4 | 67.3 | 0.0261 |
| 7  |                                 |      |      |        |
| 8  | Private insurance               | 23.7 | 24.1 |        |
| 9  |                                 |      |      |        |
| 10 | Self-pay                        | 2.2  | 2.3  |        |
| 11 |                                 |      |      |        |
| 12 | Other                           | 6.7  | 6.4  |        |
| 13 |                                 |      |      |        |
| 14 | <b>State</b>                    |      |      |        |
| 15 |                                 |      |      |        |
| 16 | Indiana                         | 27.5 | 26.9 | <.0001 |
| 17 |                                 |      |      |        |
| 18 | Kentucky                        | 21.7 | 23.3 |        |
| 19 |                                 |      |      |        |
| 20 | Ohio                            | 50.7 | 49.8 |        |
| 21 |                                 |      |      |        |
| 22 | <b>Cigarette smoked per day</b> |      |      |        |
| 23 | <b>before pregnancy</b>         |      |      |        |
| 24 |                                 |      |      |        |
| 25 | 1-10                            | 21.0 | 22.6 | <.0001 |
| 26 |                                 |      |      |        |
| 27 | 11-20                           | 30.7 | 31.8 |        |
| 28 |                                 |      |      |        |
| 29 | $\geq 21$                       | 48.3 | 45.5 |        |
| 30 |                                 |      |      |        |
| 31 |                                 |      |      |        |

<sup>a</sup> Missing values not included in column totals: maternal age 0.1%, race/ethnicity 0%, education 0.7%, marital status 0.3%, parity 0%, WIC enrollment 0.6%, BMI 2.2%, insurance 1.3%, state 0%, cigarettes/day 0%.

<sup>b</sup> Women who delivered prior to the *Tips* 2012 campaign (January 1, 2009 to March 18, 2012).

<sup>c</sup> Women for whom there was temporal overlap between the *Tips* 2012 campaign and the period including her pregnancy and the preceding three months. Women only exposed during the third trimester were excluded.

<sup>d</sup> *t* tests used for continuous variable (age); and chi-square test used for categorical variables.

**Table 2. Cessation rates<sup>a</sup> in women who smoked in the 3 months before pregnancy by exposure status to the *Tips* 2012 campaign, crude and standardized. Indiana, Kentucky, Ohio, 2009-2013.**

|         | Crude     |         |                         |                         | Standardized <sup>b</sup> |         |                         |                         |
|---------|-----------|---------|-------------------------|-------------------------|---------------------------|---------|-------------------------|-------------------------|
|         | Unexposed | Exposed | Absolute % <sup>c</sup> | Relative % <sup>c</sup> | Unexposed                 | Exposed | Absolute % <sup>c</sup> | Relative % <sup>c</sup> |
| IN      | 32.2      | 33.5    | 1.3                     | 3.9                     | 32.1                      | 33.0    | 0.9                     | 2.7                     |
| KY      | 21.9      | 26.3    | 4.4                     | 20.3                    | 21.7                      | 25.1    | 3.4                     | 15.6                    |
| OH      | 38.2      | 39.4    | 1.3                     | 3.4                     | 37.8                      | 38.8    | 1.0                     | 2.6                     |
| Overall | 33.0      | 34.8    | 1.8                     | 5.4                     | 32.8                      | 34.3    | 1.5                     | 4.4                     |
| IN+OH   | 36.1      | 37.4    | 1.3                     | 3.6                     | 35.8                      | 36.8    | 0.9                     | 2.6                     |

<sup>a</sup>The percentage of women who reported smoking > 0 cigarettes per day for the three months before pregnancy and then reported smoking 0 cigarettes per day during the third trimester of pregnancy.

<sup>b</sup>Standardized for maternal age, race/ethnicity, education, and parity using direct methods based on the 2009 first quarter population for each state for state-specific analyses, and for the combined 2009 first quarter population for the combined analysis.

<sup>c</sup>All changes in cessation rates were significant at  $p < 0.01$ .

**Table 3. Proportion and odds ratio of smoking cessation by last trimester among women who were smoking in 3 months before pregnancy and pregnant before or during a national media campaign. Indiana, Kentucky, Ohio, 2009-2013.**

|                                                | Pre-campaign <sup>a</sup><br>(n= 209,053) | During<br>campaign <sup>b</sup><br>(n= 60,747) | P-value | Crude OR<br>(95% CI) | Adjusted OR<br>(95% CI) <sup>c</sup> |
|------------------------------------------------|-------------------------------------------|------------------------------------------------|---------|----------------------|--------------------------------------|
| <b>Smoking cessation<br/>by last trimester</b> | 32.9%                                     | 34.7%                                          | <.0001  | 1.08 (1.06-1.10)     | 1.07 (1.05-1.10)                     |

<sup>a</sup> Women who smoked in the 3 months before pregnancy and delivered prior to the *Tips* 2012 campaign (January 1, 2009 to March 18, 2012).

<sup>b</sup> Women who smoked in the 3 months before pregnancy and for whom there was temporal overlap between the *Tips* 2012 campaign and the period including her pregnancy (1<sup>st</sup> and 2<sup>nd</sup> trimesters) and the preceding three months.

<sup>c</sup> Adjusted for maternal age, race, education, marital status, parity, WIC enrollment, pre-pregnancy BMI, insurance status, state, and cigarettes smoked before pregnancy (n=256,886).

**Table 4. Unadjusted and adjusted mean birth weight (grams) among quitters, before and during the *Tips* campaign. Indiana, Kentucky, Ohio, 2009-2013.**

| Exposure                                                        | Women who quit smoking by the third trimester |                           |                       |                          |
|-----------------------------------------------------------------|-----------------------------------------------|---------------------------|-----------------------|--------------------------|
|                                                                 | Unadjusted                                    |                           | Adjusted <sup>a</sup> |                          |
|                                                                 | Mean birth weight                             | Mean difference           | Mean birth weight     | Mean difference          |
| <b>Unexposed<br/>(pre-campaign)<br/>(n= 65,658)<sup>b</sup></b> | 3309                                          | -5.2<br>95% CI -14.1, 3.8 | 3228                  | -2.0<br>95% CI -9.0, 5.0 |
| <b>Exposed<br/>(during campaign)<br/>(n=20,092)<sup>c</sup></b> | 3314                                          |                           | 3230                  |                          |

<sup>a</sup> Adjusted for maternal age, race, education, marital status, parity, WIC enrollment, pre-pregnancy BMI, insurance status, state, and gestational age.

<sup>b</sup> Births to women who smoked in the 3 months before pregnancy and delivered prior to the *Tips* 2012 campaign (January 1, 2009 to March 18, 2012).

<sup>c</sup> Births to women who smoked in the 3 months before pregnancy and for whom there was temporal overlap between the *Tips* 2012 campaign and the period including her pregnancy (1<sup>st</sup> and 2<sup>nd</sup> trimesters) and the preceding three months.

Figure 1. Flow chart for study inclusion, Indiana, Kentucky, Ohio, 2009-2013

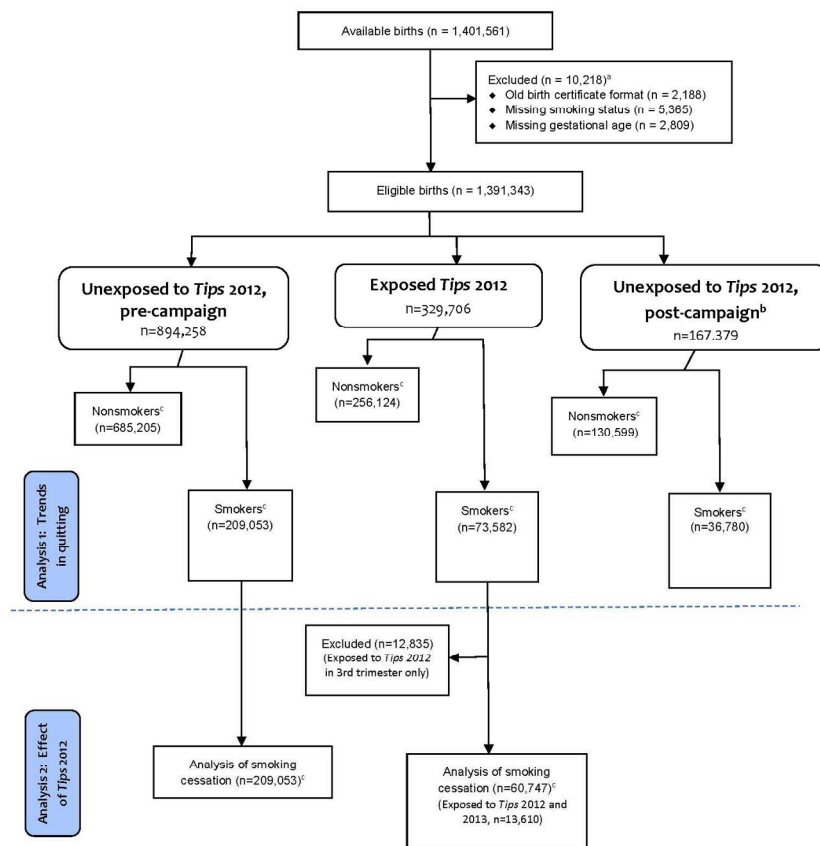

<sup>a</sup> Numbers do not add up to 10,218 because some births were excluded for more than one reason.

<sup>b</sup> Became pregnant more than 3 months after *Tips* 2012, exposed to *Tips* 2013 only.

<sup>c</sup> Non-smokers were those who reported no smoking during the 3 months before pregnancy; smokers were those who reported any smoking in the 3 months before pregnancy. Of n=60,747, 13,610 women (22.4%) were exposed to *Tips* 2012 and *Tips* 2013. When examining birthweight, only singleton births with no birth defects were analyzed (pre-campaign, n=201,030; during campaign, n=58,231).

1

Figure 1. Flow chart for study inclusion, Indiana, Kentucky, Ohio, 2009-2013 (clean)

143x186mm (300 x 300 DPI)



Figure 2. Trends in smoking cessation<sup>a</sup> rates (observed and projected<sup>b</sup>) among women who smoked in the 3 months before pregnancy (crude) and airing of the Tips campaigns,<sup>c</sup> Indiana, Kentucky, Ohio, 2009-2013.

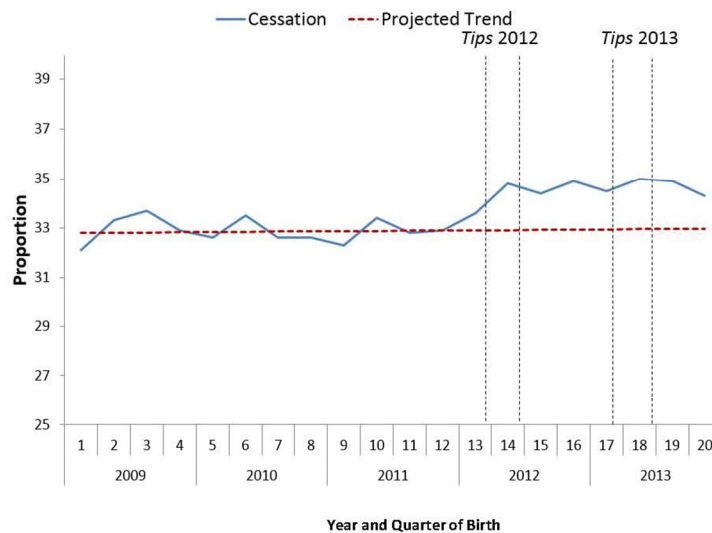

<sup>a</sup> The percentage of women who reported smoking >0 cigarettes per day for the three months before pregnancy and then reported smoking 0 cigarettes per day during the third trimester of pregnancy.

<sup>b</sup> Projected cessation trend using general linear models and pre-campaign data from January 1, 2009 through March 18, 2012, and extrapolated for 2012-2013 (intercept= 32.8; slope = 0.009). The Tips 2012 campaign ran from March 19-June 10, 2012, and Tips 2013 ran from March 4-June 24, 2013.

1

Figure 2. Trends in smoking cessation rates (observed and projected) among women who smoked in the 3 months before pregnancy (crude) and airing of the Tips campaigns, Indiana, Kentucky, Ohio, 2009-2013.

100x129mm (300 x 300 DPI)

## STROBE Checklist

**Evaluation of a federally-funded mass media campaign and smoking cessation in pregnant women: a population-based study in three states**

|                              |                                                                     |                                                                                                                                                                                                                                                                                                                                                                                                                                                                                              |
|------------------------------|---------------------------------------------------------------------|----------------------------------------------------------------------------------------------------------------------------------------------------------------------------------------------------------------------------------------------------------------------------------------------------------------------------------------------------------------------------------------------------------------------------------------------------------------------------------------------|
| Title and abstract           | Page<br>1                                                           | ✓ Indicate the study's design with commonly used terms in the title or abstract                                                                                                                                                                                                                                                                                                                                                                                                              |
|                              | 2                                                                   | ✓ Provide in the abstract an informative and balanced summary of what was done and what was found                                                                                                                                                                                                                                                                                                                                                                                            |
| Introduction                 |                                                                     |                                                                                                                                                                                                                                                                                                                                                                                                                                                                                              |
| Background/rationale         | 4-5                                                                 | ✓ Explain the scientific background and rationale for the investigation being reported                                                                                                                                                                                                                                                                                                                                                                                                       |
| <b>Methods</b>               |                                                                     |                                                                                                                                                                                                                                                                                                                                                                                                                                                                                              |
| Study design                 | 5-8                                                                 | ✓ Present key elements early in the paper                                                                                                                                                                                                                                                                                                                                                                                                                                                    |
| Setting                      | (a) 5<br>(b) 5<br>(c) 5,8<br>(d) n/a<br>(e) 6,7<br>(f) 5<br>(g) 5-7 | ✓ Describe (a) settings, (b) locations, (c) relevant dates, (d) periods of recruitment, (e) exposure, (f) follow up, and (g) data collection                                                                                                                                                                                                                                                                                                                                                 |
| Participants                 | (a)5-8, 19<br>(b) 5-8, 19<br>(c) n/a                                | <p>✓ <i>Cohort study</i>—Give the (a) eligibility criteria, and (b) the sources and methods of selection of participants. (c) Describe methods of follow-up</p> <p><i>Case-control study</i>—Give the eligibility criteria, and the sources and methods of case ascertainment and control selection. Give the rationale for the choice of cases and controls</p> <p><i>Cross-sectional study</i>—Give the eligibility criteria, and the sources and methods of selection of participants</p> |
|                              | n/a                                                                 | <p>(b) <i>Cohort study</i>—For matched studies, give matching criteria and number of exposed and unexposed</p> <p><i>Case-control study</i>—For matched studies, give matching criteria and the number of controls per case</p>                                                                                                                                                                                                                                                              |
| Variables                    | (a)5-7<br>(b)n/a                                                    | ✓ (a) Clearly define all outcomes, exposures, predictors, potential confounders, and effect modifiers. (b) Give diagnostic criteria, if applicable                                                                                                                                                                                                                                                                                                                                           |
| Data sources/<br>measurement | (a)5-7<br>(b)n/a                                                    | ✓ (a) For each variable of interest, give sources of data and details of methods of assessment (measurement). (b) Describe comparability of assessment methods if there is more than one group                                                                                                                                                                                                                                                                                               |
| Bias                         | 9-10                                                                | ✓ Describe any efforts to address potential sources of bias                                                                                                                                                                                                                                                                                                                                                                                                                                  |
| Study size                   | 5                                                                   | ✓ Explain how the study size was arrived at                                                                                                                                                                                                                                                                                                                                                                                                                                                  |
| Quantitative<br>variables    | 7-10                                                                | ✓ Explain how quantitative variables were handled in the analyses. If applicable, describe which groupings were chosen and why                                                                                                                                                                                                                                                                                                                                                               |
|                              | 7-10                                                                | ✓ Describe all statistical methods, including those used to control for confounding                                                                                                                                                                                                                                                                                                                                                                                                          |
|                              | 10                                                                  | ✓ Describe any methods used to examine subgroups and interactions                                                                                                                                                                                                                                                                                                                                                                                                                            |
|                              | 9                                                                   | ✓ Explain how missing data were addressed                                                                                                                                                                                                                                                                                                                                                                                                                                                    |

|                   |            |                                                                                                                                                                                                            |
|-------------------|------------|------------------------------------------------------------------------------------------------------------------------------------------------------------------------------------------------------------|
|                   | n/a        | <i>Cohort study</i> —If applicable, explain how loss to follow-up was addressed                                                                                                                            |
|                   | n/a        | <i>Case-control study</i> —If applicable, explain how matching of cases and controls was addressed                                                                                                         |
|                   | n/a        | <i>Cross-sectional study</i> —If applicable, describe analytical methods taking account of sampling strategy                                                                                               |
|                   | n/a        | Describe any sensitivity analyses                                                                                                                                                                          |
| <b>Results</b>    |            |                                                                                                                                                                                                            |
| Participants      | 10-11, 19  | ✓ Report numbers of individuals at each stage of study—eg numbers potentially eligible, examined for eligibility, confirmed eligible, included in the study, completing follow-up, and analysed            |
|                   | 10-11, 19  | ✓ Give reasons for non-participation at each stage                                                                                                                                                         |
|                   | 19         | ✓ Consider use of a flow diagram                                                                                                                                                                           |
| Descriptive data  | 19, 21-22  | ✓ Give characteristics of study participants (eg demographic, clinical, social) and information on exposures and potential confounders                                                                     |
|                   | 9, 23      | ✓ Indicate number of participants with missing data for each variable of interest                                                                                                                          |
|                   | n/a        | <i>Cohort study</i> —Summarise follow-up time (eg, average and total amount)                                                                                                                               |
| Outcome data      | 11, 21, 23 | ✓ <i>Cohort study</i> —Report numbers of outcome events or summary measures over time                                                                                                                      |
|                   | 21-22      | <i>Case-control study</i> —Report numbers in each exposure category, or summary measures of exposure                                                                                                       |
|                   | n/a        | <i>Cross-sectional study</i> —Report numbers of outcome events or summary measures                                                                                                                         |
| Main results      | 23, 24     | ✓ Give unadjusted estimates and, if applicable, confounder-adjusted estimates and their precision (eg, 95% confidence interval). Make clear which confounders were adjusted for and why they were included |
|                   | 21, 22     | ✓ Report category boundaries when continuous variables were categorized                                                                                                                                    |
|                   | 23         | ✓ If relevant, consider translating estimates of relative risk into absolute risk for a meaningful time period                                                                                             |
| Other analyses    | 12, 24     | ✓ Report other analyses done—eg analyses of subgroups and interactions, and sensitivity analyses                                                                                                           |
| <b>Discussion</b> |            |                                                                                                                                                                                                            |
| Key results       | 13         | ✓ Summarise key results with reference to study objectives                                                                                                                                                 |
| Limitations       | 14,15      | ✓ Discuss limitations of the study, taking into account sources of potential bias or imprecision. Discuss both direction and magnitude of                                                                  |

|                          |       |                                                                                                                                                                              |
|--------------------------|-------|------------------------------------------------------------------------------------------------------------------------------------------------------------------------------|
|                          |       | any potential bias                                                                                                                                                           |
| Interpretation           | 15,16 | ✓ Give a cautious overall interpretation of results considering objectives, limitations, multiplicity of analyses, results from similar studies, and other relevant evidence |
| Generalizability         | 14,15 | ✓ Discuss the generalisability (external validity) of the study results                                                                                                      |
| <b>Other information</b> |       |                                                                                                                                                                              |
| Funding                  | 17    | ✓ Give the source of funding and the role of the funders for the present study and, if applicable, for the original study on which the present article is based              |

For peer review only
